# Supplementary material for: Reactions of diphosphine-stabilized Os3 clusters with triphenylantimony: syntheses and structures of new antimony-containing Os3 clusters via Sb–Ph bond cleavage
Source: Royal Society of Chemistry journal article supplement (doi:10.1039/d2ra07284j), 2023-01-01
Supplement: d2ra07284j1.pdf [file d2ra07284j1.pdf]

## **Supplementary Information (SI)**

### **Reactions of diphosphine-stabilized Os<sub>3</sub> clusters with triphenylantimony: Syntheses and structures of new antimony-containing Os<sub>3</sub> clusters via Sb-Ph bond cleavage**

**Fahmida Islam<sup>a</sup>, Md. Sohag Hasan<sup>a</sup>, Shishir Ghosh<sup>a,\*</sup>, Michael G. Richmond<sup>b</sup>, Shariff E. Kabir<sup>a,c,\*</sup>, Herbert W. Roesky<sup>c,\*</sup>**

<sup>a</sup> *Department of Chemistry, Jahangirnagar University, Savar, Dhaka 1342, Bangladesh*

<sup>b</sup> *Department of Chemistry, University of North Texas, 1155 Union Circle, Box 305070, Denton, TX 76203, USA*

<sup>c</sup> *Institute of Inorganic Chemistry, Georg-August University of Göttingen, Tammannstr 4, 37077 Göttingen, Germany*

\*Corresponding authors.

E-mail addresses: [sghosh\\_006@yahoo.com](mailto:sghosh_006@yahoo.com) (S. Ghosh); [skabir\\_ju@yahoo.com](mailto:skabir_ju@yahoo.com) (S.E. Kabir); [hroesky@gwdg.de](mailto:hroesky@gwdg.de) (H.W. Roesky)

### **List of Figures and Tables**

**Fig. S1.** Aliphatic region of the <sup>1</sup>H NMR spectrum of [Os<sub>3</sub>(CO)<sub>9</sub>(SbPh<sub>3</sub>)(μ-dppm)] (**1**) in CDCl<sub>3</sub>.

**Fig. S2.** Aromatic region of the <sup>1</sup>H NMR spectrum of [Os<sub>3</sub>(CO)<sub>9</sub>(SbPh<sub>3</sub>)(μ-dppm)] (**1**) in CDCl<sub>3</sub>.

**Fig. S3.** <sup>31</sup>P {<sup>1</sup>H} NMR spectrum of [Os<sub>3</sub>(CO)<sub>9</sub>(SbPh<sub>3</sub>)(μ-dppm)] (**1**) in CDCl<sub>3</sub>.

**Fig. S4.** Hydride region of the <sup>1</sup>H NMR spectrum of [HOs<sub>3</sub>(CO)<sub>7</sub>(SbPh<sub>3</sub>)<sub>3</sub>{μ<sub>3</sub>-Ph<sub>2</sub>PCH<sub>2</sub>(Ph)C<sub>6</sub>H<sub>4</sub>}] (**2**) in CD<sub>2</sub>Cl<sub>2</sub>.

**Fig. S5.** Aliphatic region of the  $^1\text{H}$  NMR spectrum of  $[\text{HOs}_3(\text{CO})_7(\text{SbPh}_3)\{\mu_3\text{-Ph}_2\text{PCH}_2(\text{Ph})\text{C}_6\text{H}_4\}]$  (**2**) in  $\text{CD}_2\text{Cl}_2$ .

**Fig. S6.** Aromatic region of the  $^1\text{H}$  NMR spectrum of  $[\text{HOs}_3(\text{CO})_7(\text{SbPh}_3)\{\mu_3\text{-Ph}_2\text{PCH}_2(\text{Ph})\text{C}_6\text{H}_4\}]$  (**2**) in  $\text{CD}_2\text{Cl}_2$ .

**Fig. S7.**  $^{31}\text{P}\{^1\text{H}\}$  NMR spectrum of  $[\text{HOs}_3(\text{CO})_7(\text{SbPh}_3)\{\mu_3\text{-Ph}_2\text{PCH}_2(\text{Ph})\text{C}_6\text{H}_4\}]$  (**2**) in  $\text{CD}_2\text{Cl}_2$ .

**Fig. S8.** Hydride region of the  $^1\text{H}$  NMR spectrum of  $[\text{HOs}_3(\text{CO})_7(\text{SbPh}_3)(\mu,\eta^2\text{-C}_6\text{H}_4)(\mu\text{-SbPh}_2)(\mu\text{-dppm})]$  (**3**) in  $\text{CDCl}_3$ .

**Fig. S9.** Aliphatic region of the  $^1\text{H}$  NMR spectrum of  $[\text{HOs}_3(\text{CO})_7(\text{SbPh}_3)(\mu,\eta^2\text{-C}_6\text{H}_4)(\mu\text{-SbPh}_2)(\mu\text{-dppm})]$  (**3**) in  $\text{CDCl}_3$ .

**Fig. S10.** Aromatic region of the  $^1\text{H}$  NMR spectrum of  $[\text{HOs}_3(\text{CO})_7(\text{SbPh}_3)(\mu,\eta^2\text{-C}_6\text{H}_4)(\mu\text{-SbPh}_2)(\mu\text{-dppm})]$  (**3**) in  $\text{CDCl}_3$ .

**Fig. S11.**  $^{31}\text{P}\{^1\text{H}\}$  NMR spectrum of  $[\text{HOs}_3(\text{CO})_7(\text{SbPh}_3)(\mu,\eta^2\text{-C}_6\text{H}_4)(\mu\text{-SbPh}_2)(\mu\text{-dppm})]$  (**3**) in  $\text{CDCl}_3$ .

**Fig. S12.** Aliphatic region of the  $^1\text{H}$  NMR spectrum of  $[\text{Os}_3(\text{CO})_8(\eta^1\text{-Ph})(\text{SbPh}_3)(\mu\text{-SbPh}_2)(\mu\text{-dppm})]$  (**4**) in  $\text{CD}_2\text{Cl}_2$ .

**Fig. S13.** Aromatic region of the  $^1\text{H}$  NMR spectrum of  $[\text{Os}_3(\text{CO})_8(\eta^1\text{-Ph})(\text{SbPh}_3)(\mu\text{-SbPh}_2)(\mu\text{-dppm})]$  (**4**) in  $\text{CD}_2\text{Cl}_2$ .

**Fig. S14.**  $^{31}\text{P}\{^1\text{H}\}$  NMR spectrum of  $[\text{Os}_3(\text{CO})_8(\eta^1\text{-Ph})(\text{SbPh}_3)(\mu\text{-SbPh}_2)(\mu\text{-dppm})]$  (**4**) in  $\text{CD}_2\text{Cl}_2$ .

**Table S1.** Selected bond distances ( $\text{\AA}$ ) and angles ( $^\circ$ ) for clusters **1-4**.

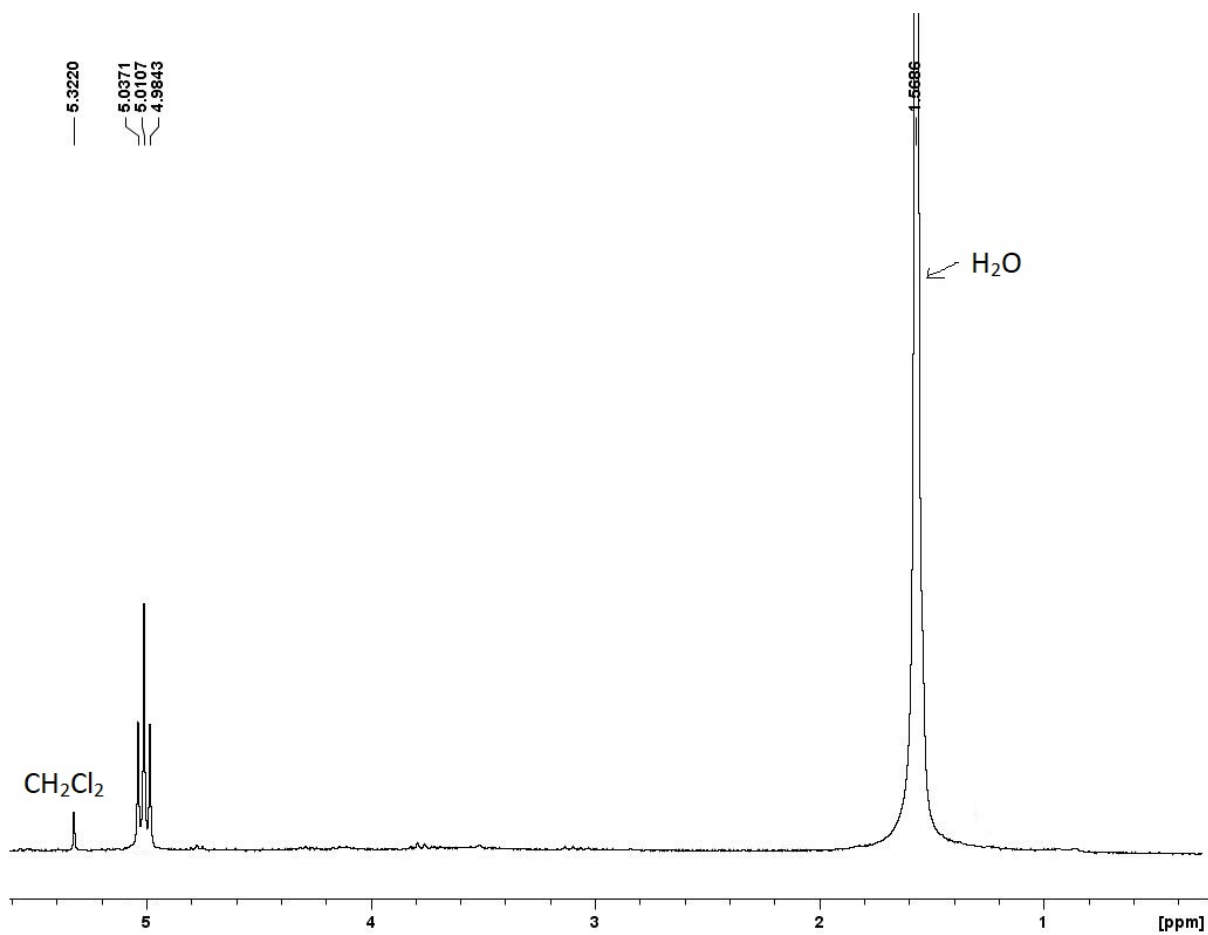

**Fig. S1.** Aliphatic region of the  $^1\text{H}$  NMR spectrum of  $[\text{Os}_3(\text{CO})_9(\text{SbPh}_3)(\mu\text{-dppm})]$  (1) in  $\text{CDCl}_3$ .

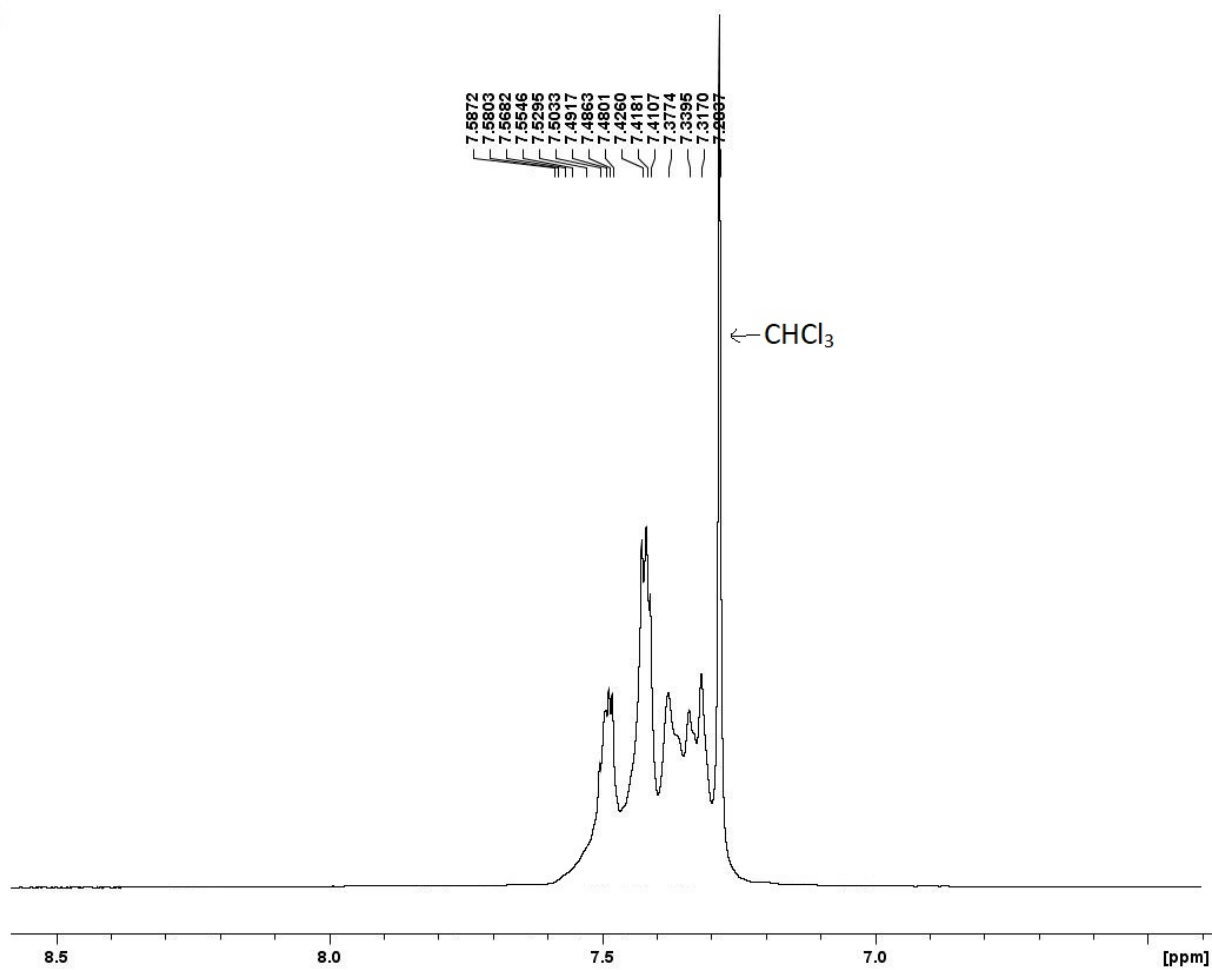

**Fig. S2.** Aromatic region of the <sup>1</sup>H NMR spectrum of [Os<sub>3</sub>(CO)<sub>9</sub>(SbPh<sub>3</sub>)(μ-dppm)] (**1**) in CDCl<sub>3</sub>.

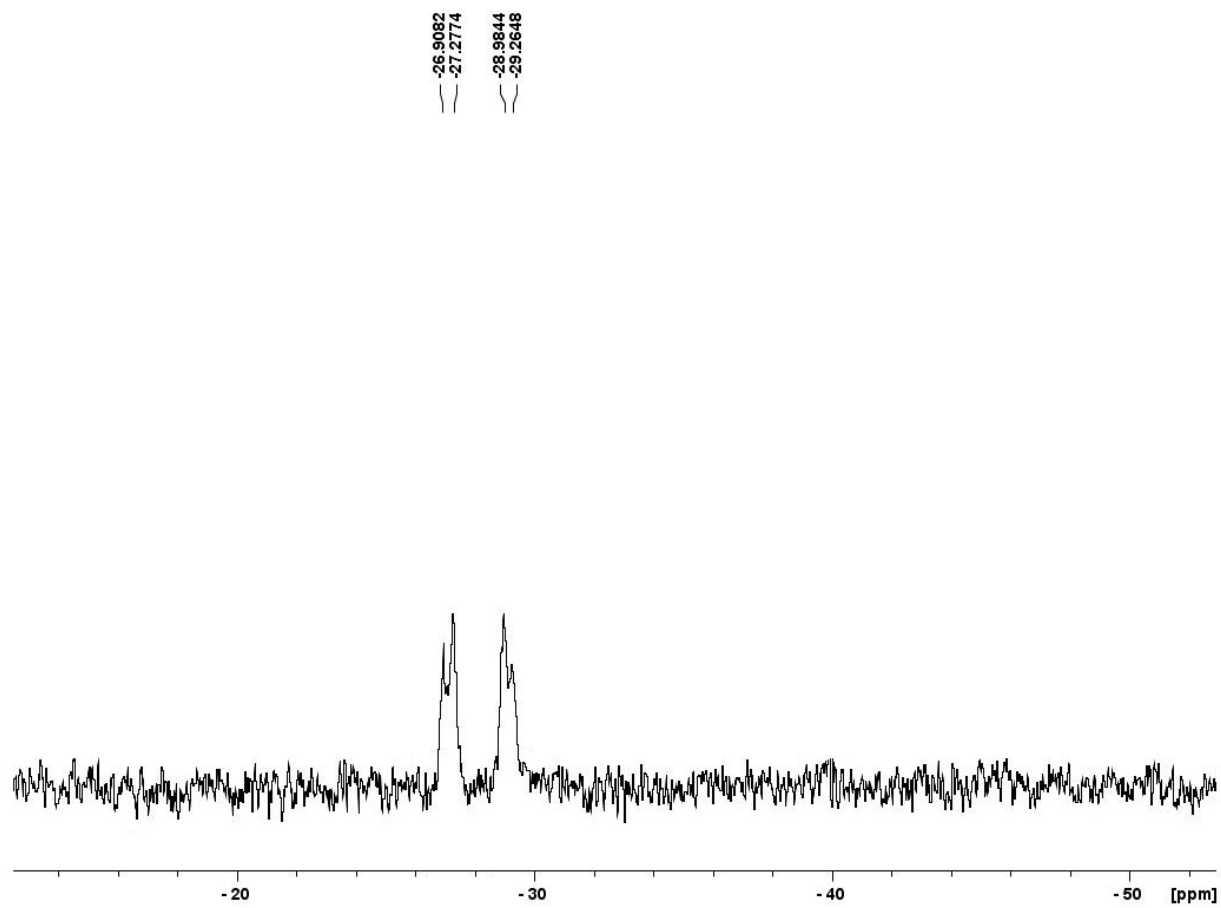

**Fig. S3.**  $^{31}\text{P}\{^1\text{H}\}$  NMR spectrum of  $[\text{Os}_3(\text{CO})_9(\text{SbPh}_3)(\mu\text{-dppm})]$  (**1**) in  $\text{CDCl}_3$ .

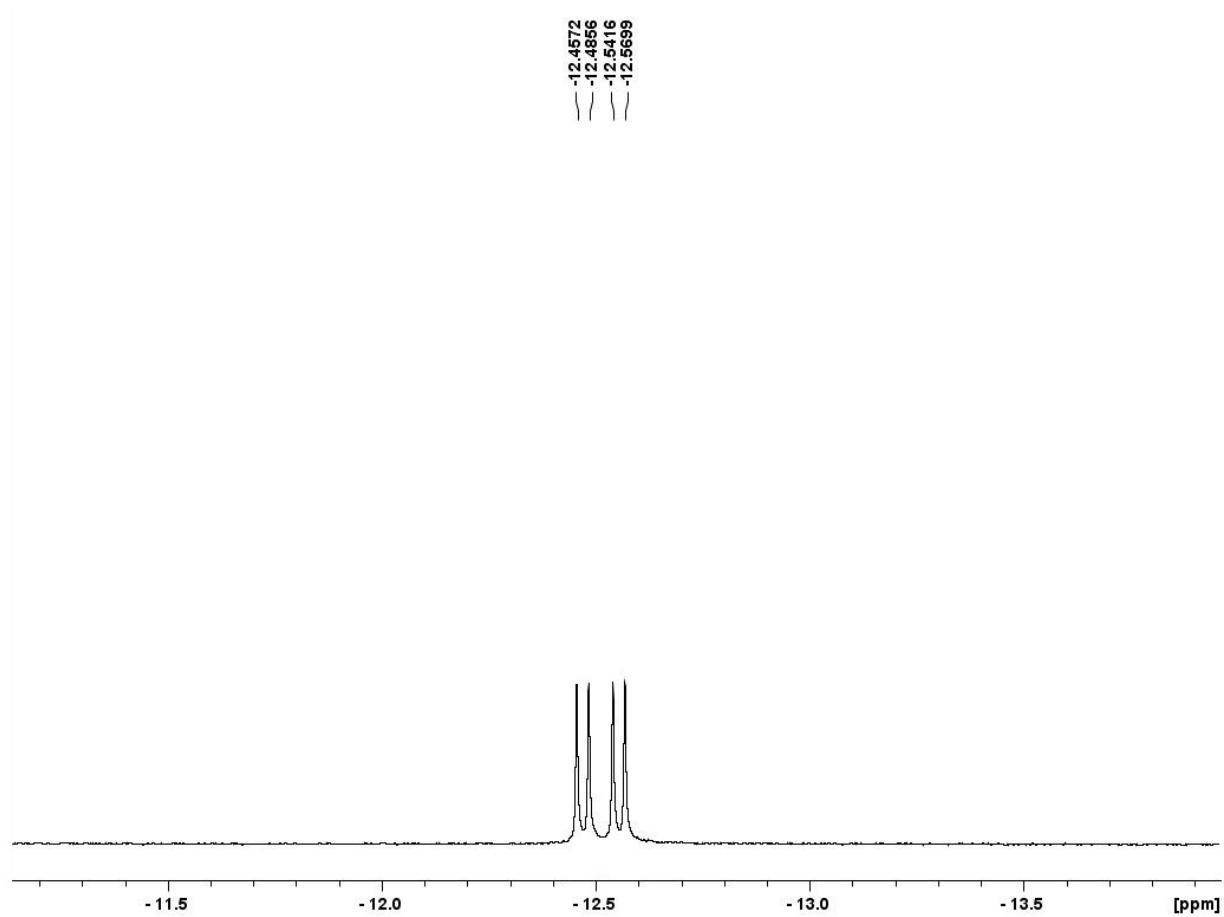

**Fig. S4.** Hydride region of the  $^1\text{H}$  NMR spectrum of  $[\text{HOs}_3(\text{CO})_7(\text{SbPh}_3)\{\mu_3\text{-Ph}_2\text{PCH}_2(\text{Ph})\text{C}_6\text{H}_4\}]$  (**2**) in  $\text{CD}_2\text{Cl}_2$ .

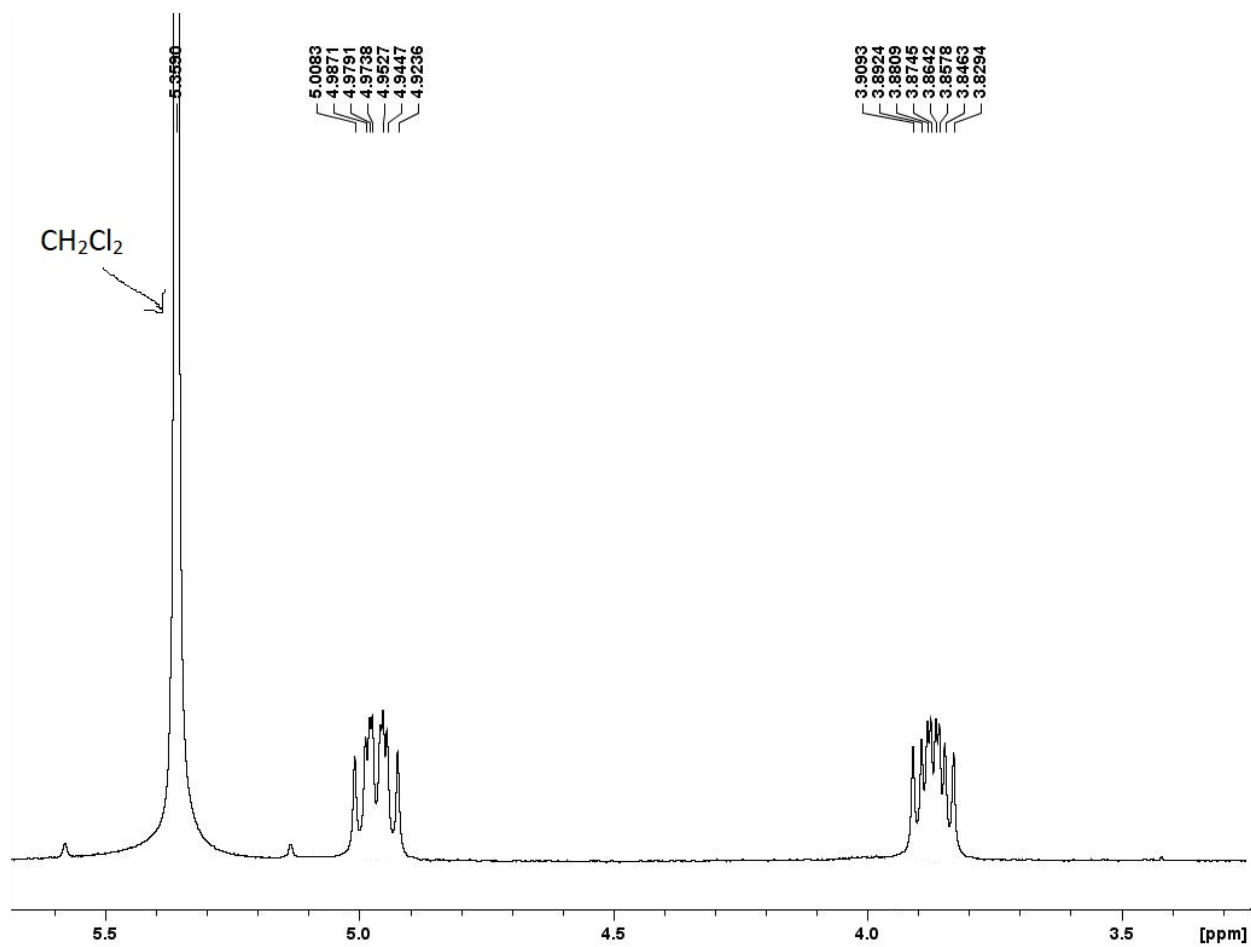

**Fig. S5.** Aliphatic region of the  $^1\text{H}$  NMR spectrum of  $[\text{HO}_3(\text{CO})_7(\text{SbPh}_3)\{\mu_3\text{-Ph}_2\text{PCH}_2(\text{Ph})\text{C}_6\text{H}_4\}]$  (2) in  $\text{CD}_2\text{Cl}_2$ .

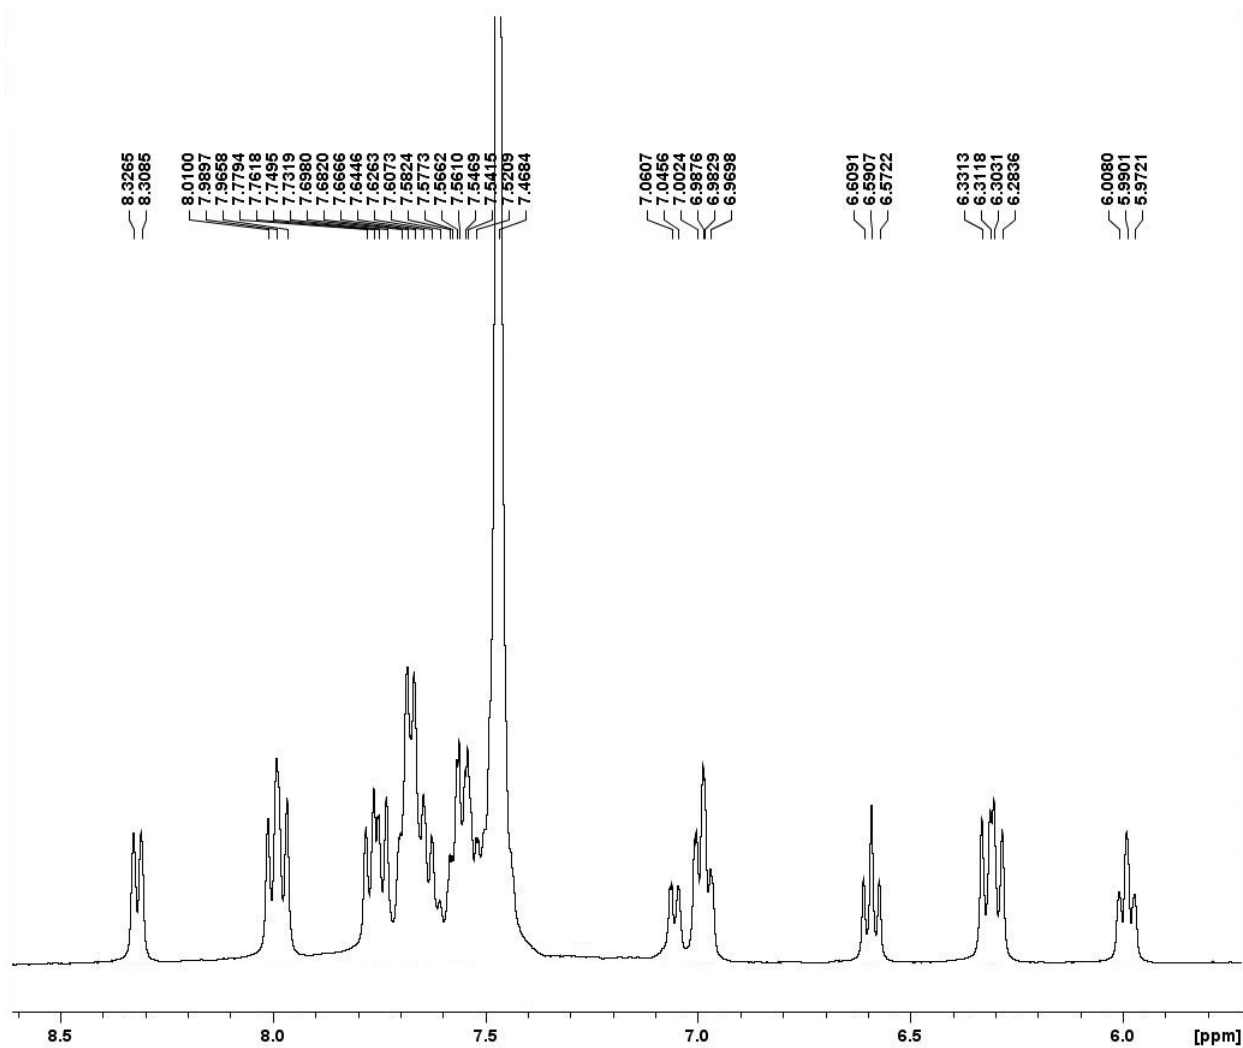

**Fig. S6.** Aromatic region of the  $^1\text{H}$  NMR spectrum of  $[\text{HO}_3(\text{CO})_7(\text{SbPh}_3)\{\mu_3\text{-Ph}_2\text{PCH}_2(\text{Ph})\text{C}_6\text{H}_4\}]$  (2) in  $\text{CD}_2\text{Cl}_2$ .



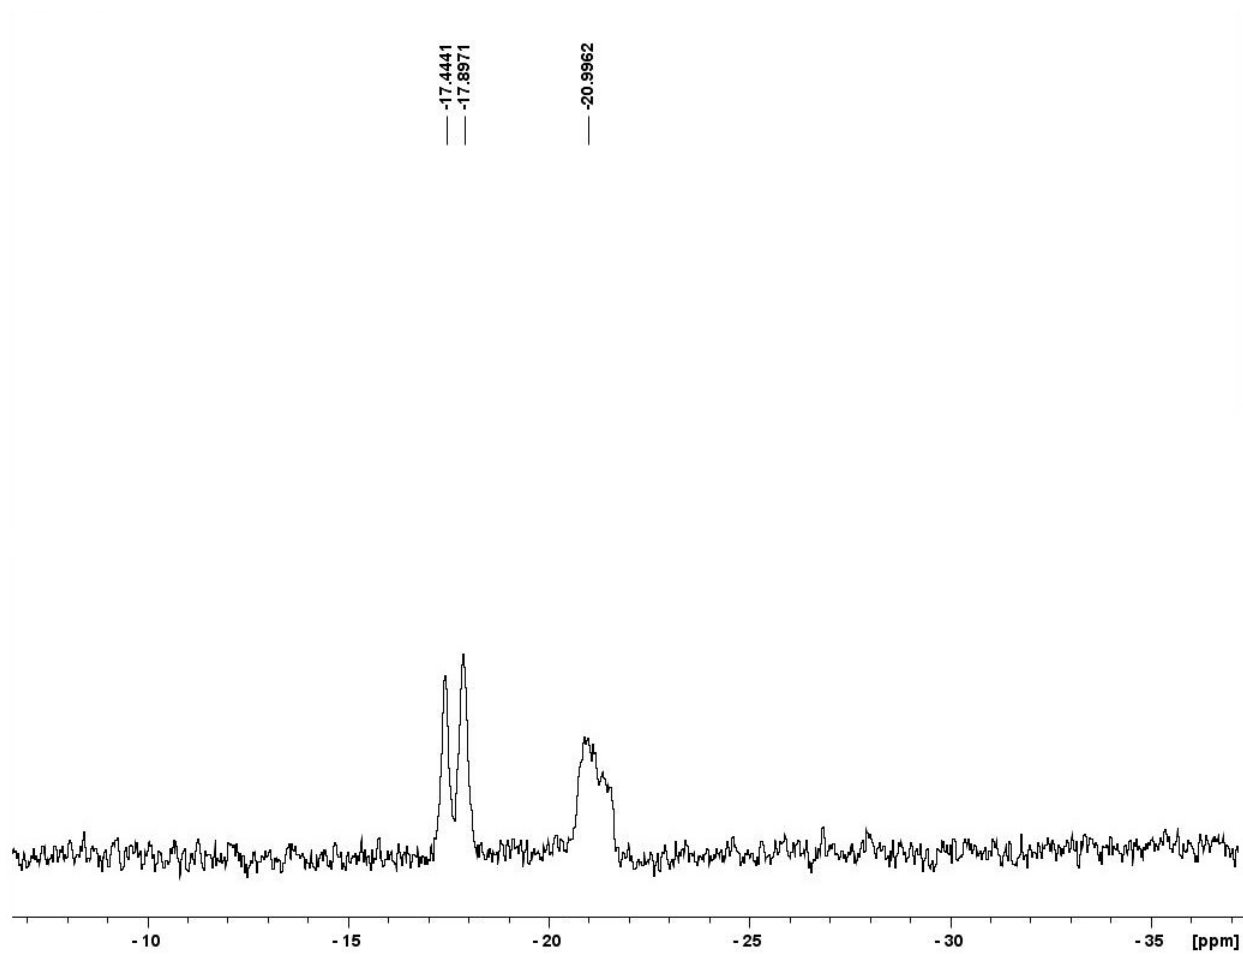

**Fig. S7.**  $^{31}\text{P}\{^1\text{H}\}$  NMR spectrum of  $[\text{HOs}_3(\text{CO})_7(\text{SbPh}_3)\{\mu_3\text{-Ph}_2\text{PCH}_2(\text{Ph})\text{C}_6\text{H}_4\}]$  (**2**) in  $\text{CD}_2\text{Cl}_2$ .

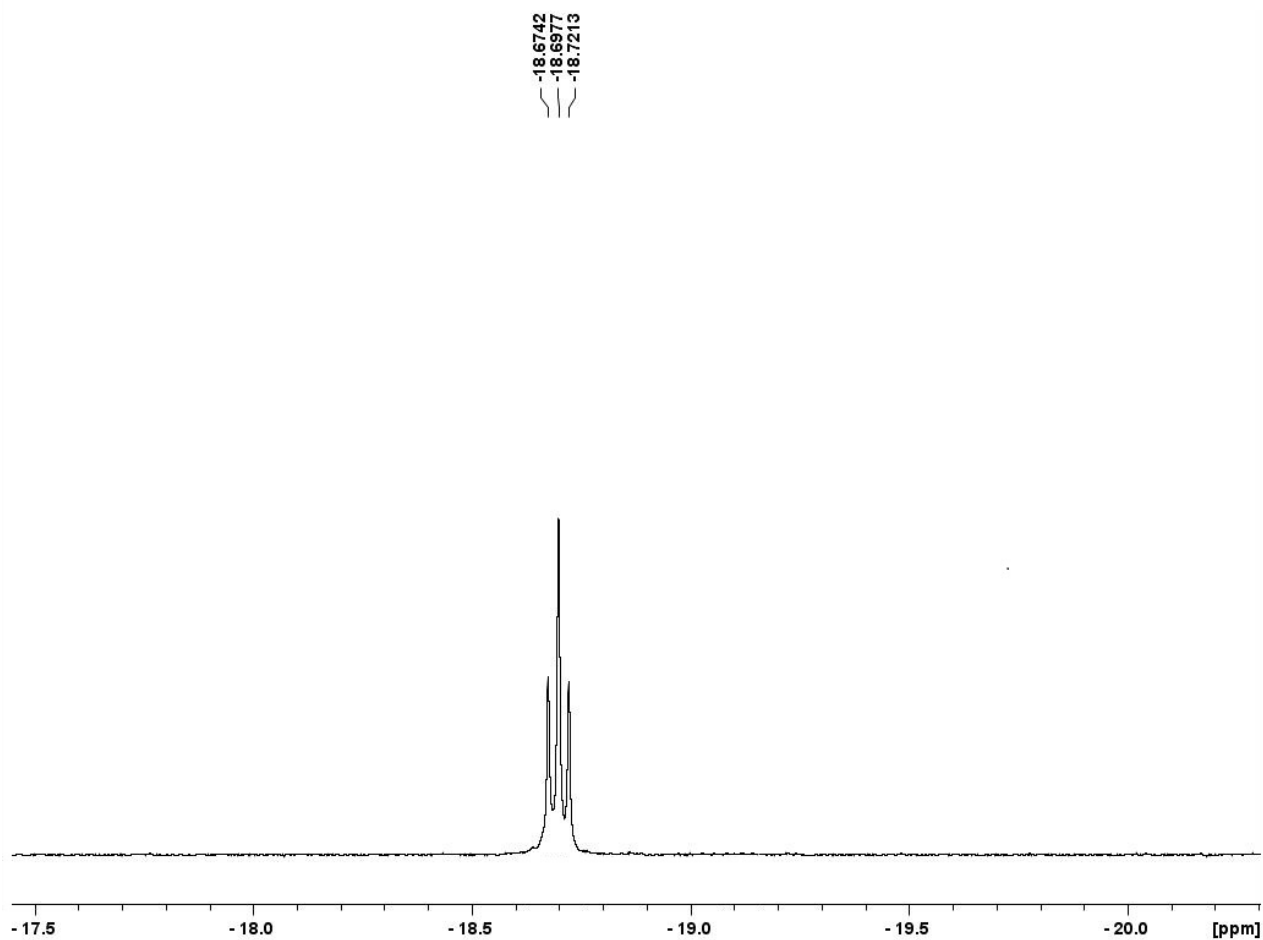

**Fig. S8.** Hydride region of the  $^1\text{H}$  NMR spectrum of  $[\text{HOs}_3(\text{CO})_7(\text{SbPh}_3)(\mu, \eta^2\text{-C}_6\text{H}_4)(\mu\text{-SbPh}_2)(\mu\text{-dppm})]$  (**3**) in  $\text{CDCl}_3$ .

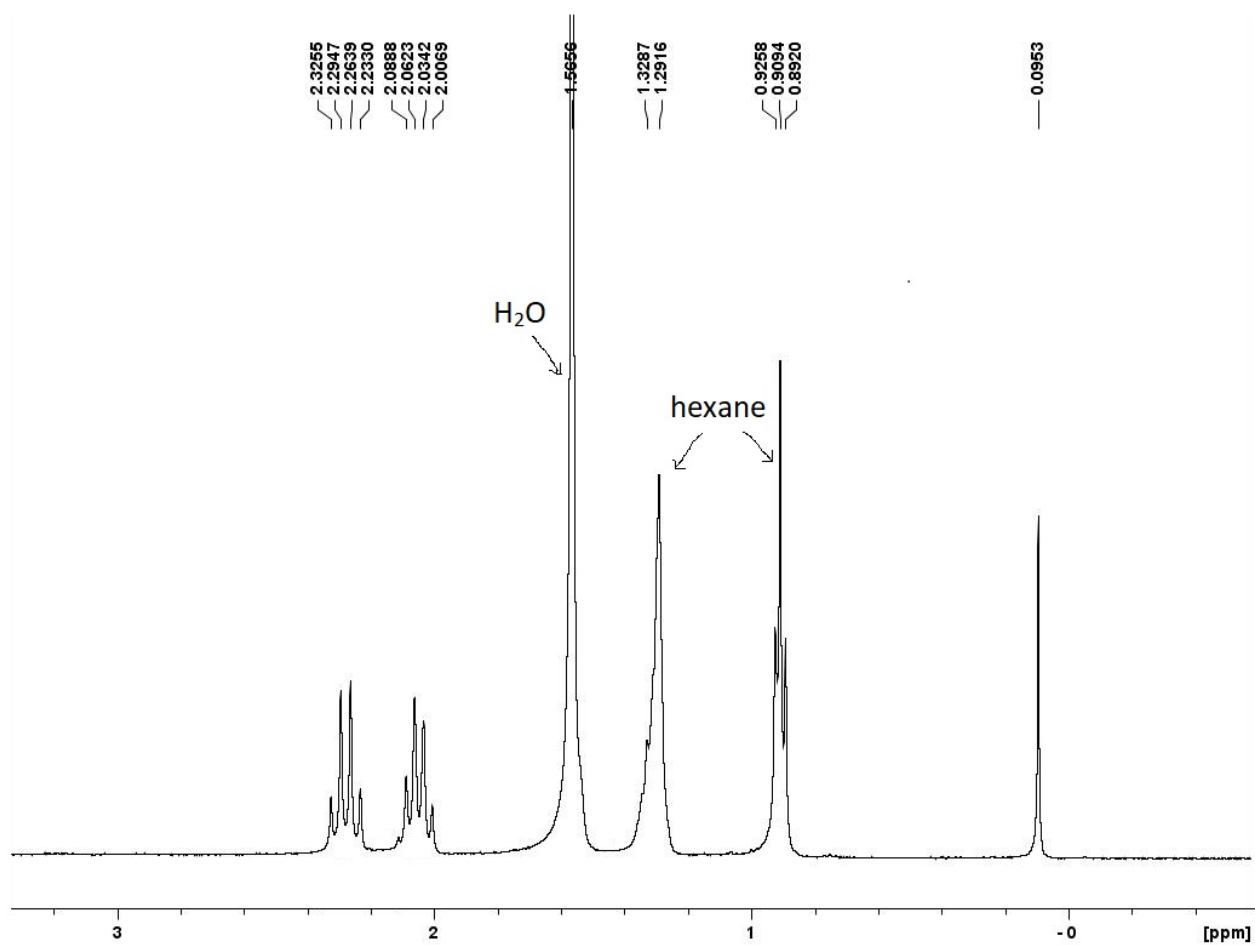

**Fig. S9.** Aliphatic region of the  $^1\text{H}$  NMR spectrum of  $[\text{HOs}_3(\text{CO})_7(\text{SbPh}_3)(\mu, \eta^2\text{-C}_6\text{H}_4)(\mu\text{-SbPh}_2)(\mu\text{-dppm})]$  (**3**) in  $\text{CDCl}_3$ .

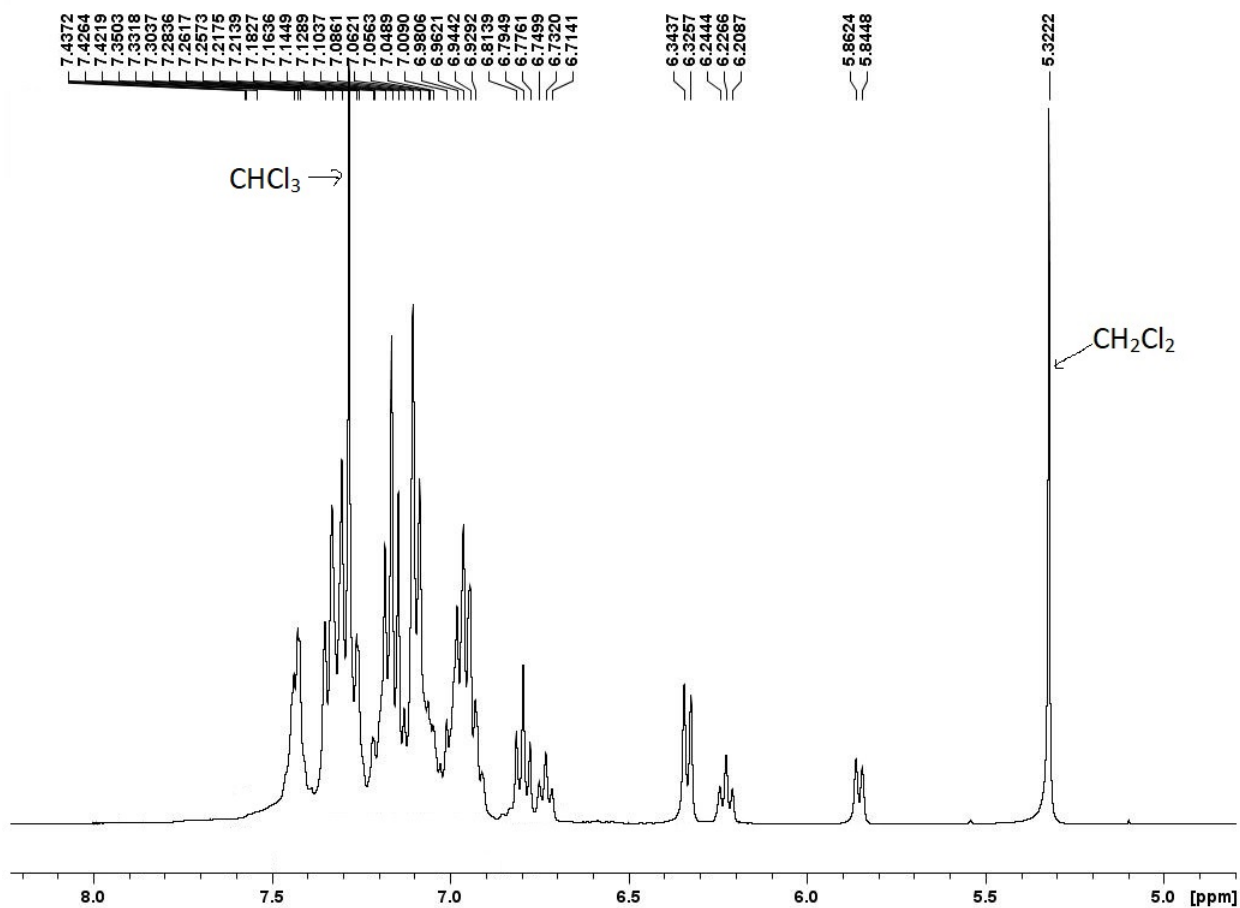

**Fig. S10.** Aromatic region of the  $^1\text{H}$  NMR spectrum of  $[\text{HO}_3(\text{CO})_7(\text{SbPh}_3)(\mu,\eta^2\text{-C}_6\text{H}_4)(\mu\text{-SbPh}_2)(\mu\text{-dppm})]$  (**3**) in  $\text{CDCl}_3$ .

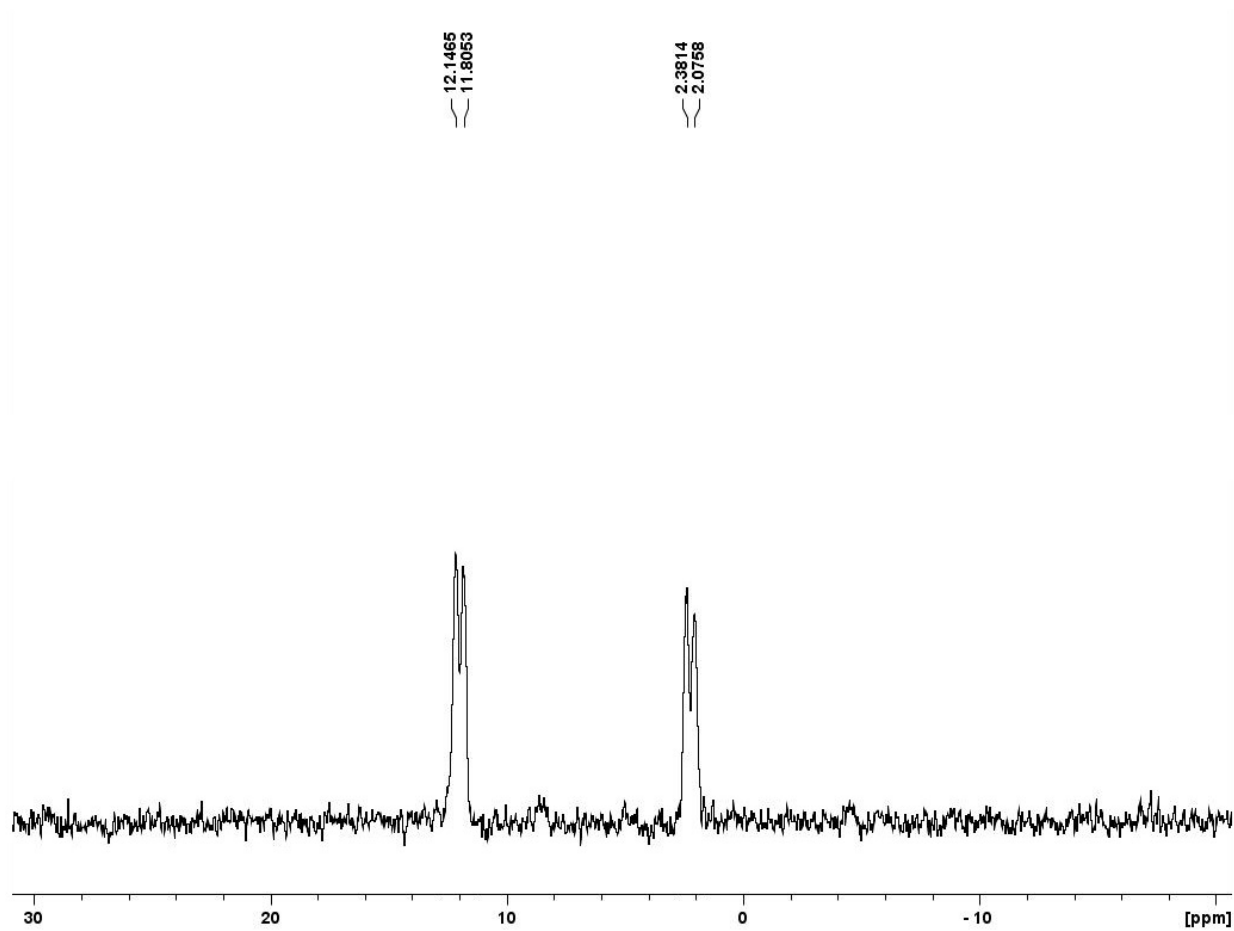

**Fig. S11.**  $^{31}\text{P}\{^1\text{H}\}$  NMR spectrum of  $[\text{HOs}_3(\text{CO})_7(\text{SbPh}_3)(\mu,\eta^2\text{-C}_6\text{H}_4)(\mu\text{-SbPh}_2)(\mu\text{-dppm})]$  (**3**) in  $\text{CDCl}_3$ .

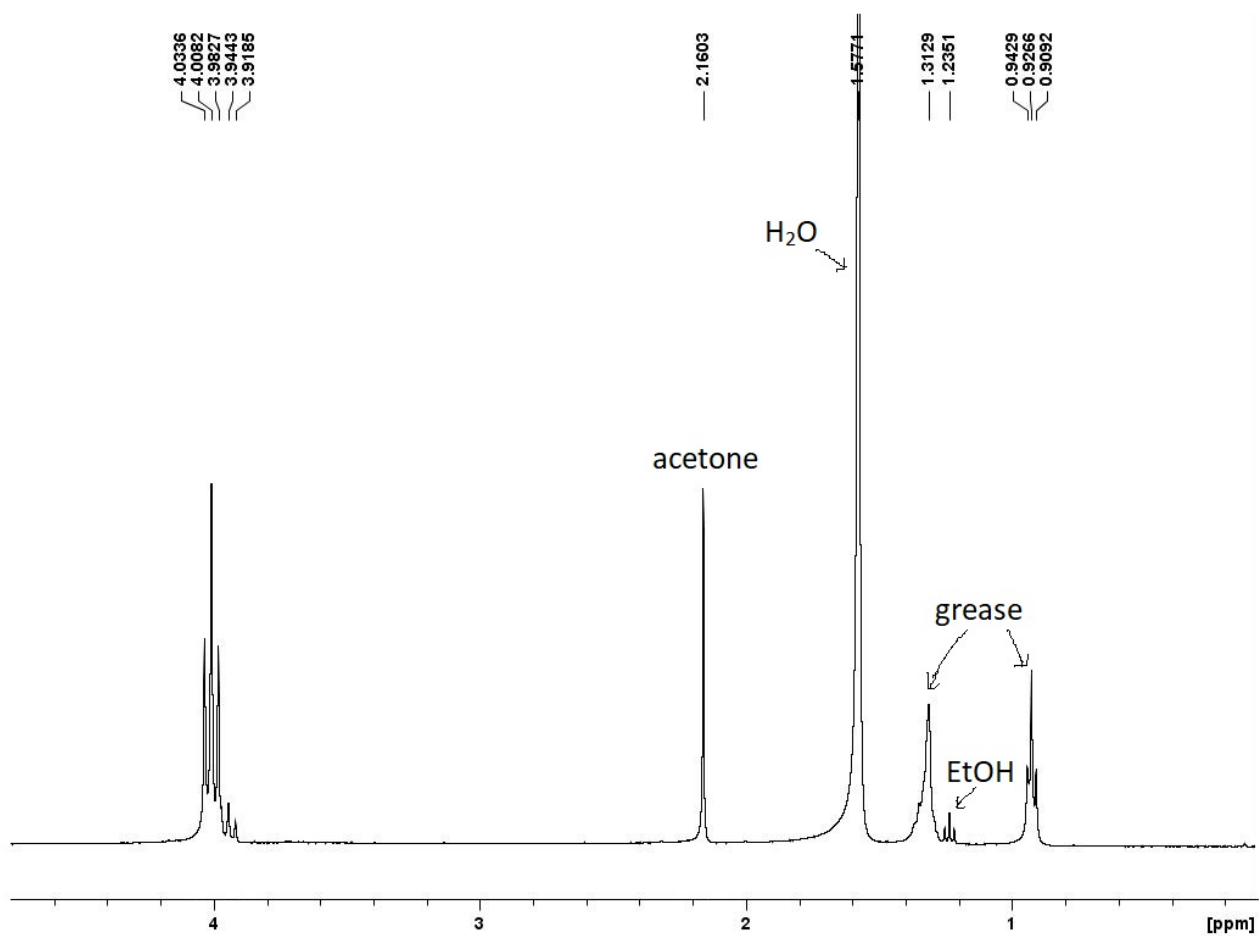

**Fig. S12.** Aliphatic region of the <sup>1</sup>H NMR spectrum of [Os<sub>3</sub>(CO)<sub>8</sub>(η<sup>1</sup>-Ph)(SbPh<sub>3</sub>)(μ-SbPh<sub>2</sub>)(μ-dppm)] (**4**) in CD<sub>2</sub>Cl<sub>2</sub>.

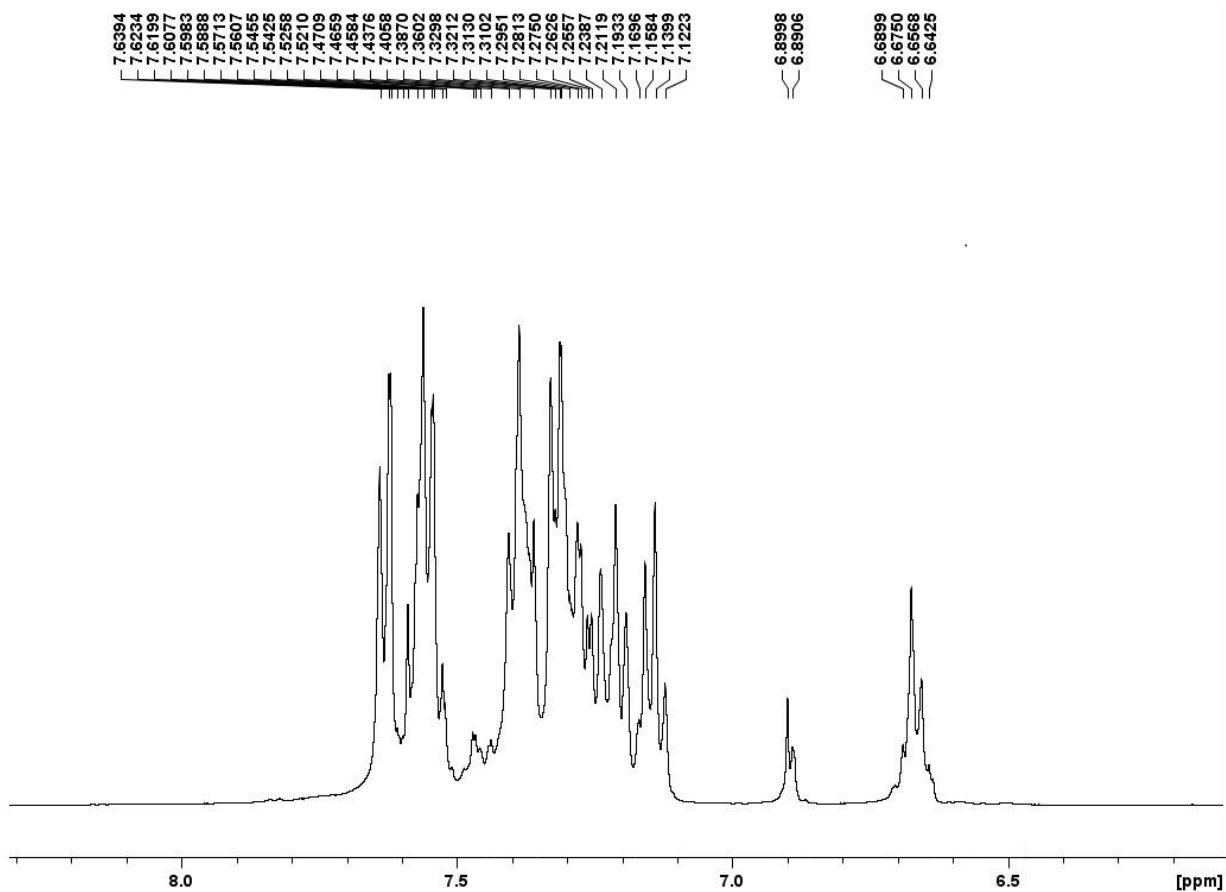

**Fig. S13.** Aromatic region of the  $^1\text{H}$  NMR spectrum of  $[\text{Os}_3(\text{CO})_8(\eta^1\text{-Ph})(\text{SbPh}_3)(\mu\text{-SbPh}_2)(\mu\text{-dppm})]$  (**4**) in  $\text{CD}_2\text{Cl}_2$ .

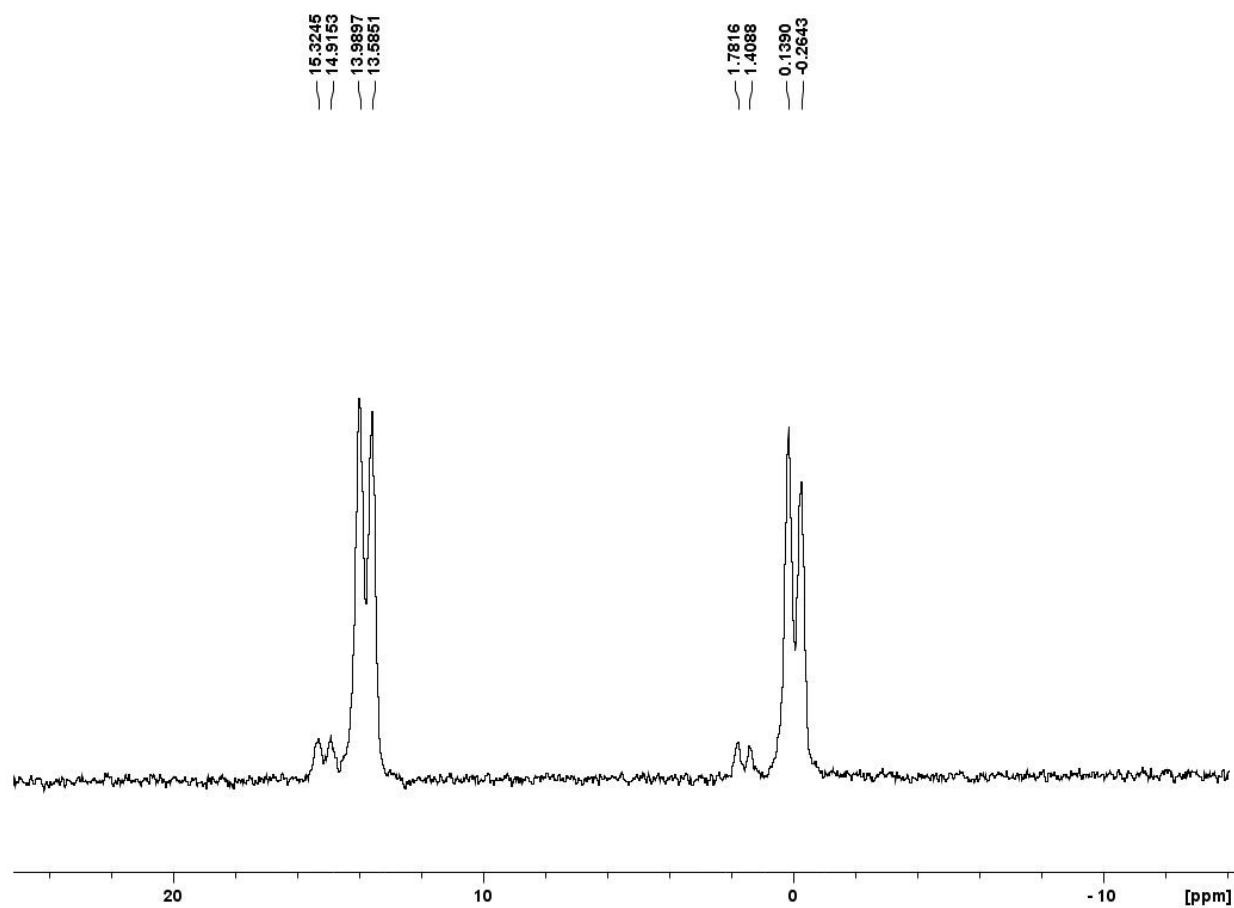

**Fig. S14.**  $^{31}\text{P}\{^1\text{H}\}$  NMR spectrum of  $[\text{Os}_3(\text{CO})_8(\eta^1\text{-Ph})(\text{SbPh}_3)(\mu\text{-SbPh}_2)(\mu\text{-dppm})]$  (**4**) in  $\text{CD}_2\text{Cl}_2$ .



**Table S1.** Selected bond distances (Å) and angles (°) for clusters **1-4**

---

**Cluster 1**

Bond Distances

Os(1)–Os(2) 2.8807(2), Os(1)–Os(3) 2.9153(2), Os(2)–Os(3) 2.8648(2), Os(1)–P(1) 2.3363(9), Os(2)–P(2) 2.3234(9), Os(3)–Sb(1) 2.5921(3)

Bond Angles

Os(2)–Os(1)–Os(3) 59.240(5), Os(1)–Os(2)–Os(3) 60.982(5), Os(1)–Os(3)–Os(2) 59.779(5), Sb(1)–Os(3)–Os(1) 93.868(8), Sb(1)–Os(3)–Os(2) 153.206(9), P(1)–Os(1)–Os(2) 88.54(2), P(1)–Os(1)–Os(3) 147.54(2), P(2)–Os(2)–Os(1) 94.12(2), P(2)–Os(2)–Os(3) 153.06(2)

**Cluster 2**

Bond Distances

Os(1)–Os(2) 2.8249(3), Os(1)–Os(3) 2.7720(3), Os(2)–Os(3) 2.8101(3), Os(1)–P(1) 2.3290(12), Os(2)–P(2) 2.3314(12), Os(3)–Sb(1) 2.6343(4), Os(1)–C(10) 2.232(4), Os(3)–C(10) 2.399(4)

Bond Angles

Os(2)–Os(1)–Os(3) 60.266(7), Os(1)–Os(2)–Os(3) 58.935(7), Os(1)–Os(3)–Os(2) 60.799(6), Sb(1)–Os(3)–Os(1) 109.604(9), Sb(1)–Os(3)–Os(2) 169.035(10), Sb(1)–Os(3)–C(10) 93.54(10), P(1)–Os(1)–Os(2) 90.71(3), P(1)–Os(1)–Os(3) 131.53(3), P(2)–Os(2)–Os(1) 77.51(3), P(2)–Os(2)–Os(3) 85.60(3), C(10)–Os(1)–Os(3) 56.06(11), Os(1)–C(10)–Os(3) 73.42(13)

**Cluster 3**

Bond Distances

Os(1)–Os(2) 3.1729(4), Os(2)–Os(3) 2.9725(4), Os(1)–P(1) 2.335(2), Os(2)–P(2) 2.3328(19), Os(1)–Sb(1) 2.6400(6), Os(3)–Sb(1) 2.7081(5), Os(3)–Sb(2) 2.6137(6), Os(1)–C(8) 2.134(7), Os(2)–C(9) 2.128(7)

Bond Angles

Os(2)–Os(1)–Os(3) 88.959(11), P(1)–Os(1)–Os(2) 87.45(5), P(1)–Os(1)–C(8) 85.7(2), P(1)–Os(1)–Sb(1) 163.05(5), Sb(1)–Os(1)–Os(2) 78.881(14), Sb(1)–Os(1)–C(8) 79.5(2), P(2)–Os(2)–Os(1) 89.72(5), P(2)–Os(2)–Os(3) 176.04(6), P(2)–Os(2)–C(9) 82.9(2), C(9)–Os(2)–Os(3) 93.2(2), C(9)–Os(2)–Os(1) 66.1(2), Sb(2)–Os(3)–Os(2) 176.300(19), Sb(1)–Os(3)–Sb(2) 100.789(18), Sb(1)–Os(3)–Os(2) 81.559(13), Os(1)–Sb(1)–Os(3) 107.319(19)

### Cluster 4

#### Bond Distances

Os(1)–Os(2) 3.0211(3), Os(2)–Os(3) 3.0024(3), Os(1)–P(1) 2.3177(11), Os(2)–P(2) 2.3096(12), Os(1)–Sb(1) 2.6479(3), Os(3)–Sb(1) 2.6695(4), Os(3)–Sb(2) 2.6468(4), Os(1)–C(9) 2.143(5)

#### Bond Angles

Os(2)–Os(1)–Os(3) 92.473(7), P(1)–Os(1)–Os(2) 94.12(3), P(1)–Os(1)–C(9) 93.11(12), P(1)–Os(1)–Sb(1) 167.76(3), Sb(1)–Os(1)–Os(2) 75.271(9), Sb(1)–Os(1)–C(9) 97.26(12), P(2)–Os(2)–Os(1) 85.14(3), P(2)–Os(2)–Os(3) 176.03(3), Sb(2)–Os(3)–Os(2) 95.815(9), Sb(1)–Os(3)–Sb(2) 167.637(11), Sb(1)–Os(3)–Os(2) 75.292(8), Os(1)–Sb(1)–Os(3) 109.790(11), C(9)–Os(1)–Os(2) 172.35(12)

## Computational Details

### M06 geometries for the optimized structures A-D

Coordinates: A

|    |             |             |             |
|----|-------------|-------------|-------------|
| Os | 26.06520000 | 8.07750000  | 9.03760000  |
| Os | 28.84330000 | 7.22870000  | 9.84490000  |
| Os | 26.96270000 | 8.19650000  | 11.89280000 |
| Sb | 24.71850000 | 9.40190000  | 12.60700000 |
| P  | 26.71000000 | 7.61310000  | 6.80480000  |
| P  | 29.20130000 | 6.15570000  | 7.76590000  |
| C  | 26.39260000 | 10.00860000 | 9.11080000  |
| C  | 24.22030000 | 8.40840000  | 8.70090000  |
| C  | 25.74840000 | 6.17280000  | 9.30030000  |
| C  | 29.22420000 | 9.07380000  | 9.32190000  |
| C  | 30.60100000 | 7.02670000  | 10.55010000 |
| C  | 28.32420000 | 5.51480000  | 10.64940000 |
| C  | 27.86060000 | 9.92370000  | 11.65660000 |
| C  | 27.91100000 | 7.96330000  | 13.51590000 |
| C  | 26.09250000 | 6.45710000  | 12.16360000 |
| O  | 26.48660000 | 11.15990000 | 9.10990000  |
| O  | 23.10540000 | 8.55000000  | 8.42040000  |
| O  | 25.48890000 | 5.04310000  | 9.34190000  |
| O  | 29.54990000 | 10.14700000 | 9.03860000  |
| O  | 31.69410000 | 6.92210000  | 10.91470000 |
| O  | 28.13630000 | 4.48010000  | 11.11970000 |
| O  | 28.38570000 | 10.94870000 | 11.64830000 |
| O  | 28.48630000 | 7.79750000  | 14.50550000 |
| O  | 25.55560000 | 5.47930000  | 12.45310000 |
| C  | 27.68520000 | 6.04230000  | 6.70420000  |
| H  | 27.91830000 | 5.74320000  | 5.67080000  |
| H  | 27.04270000 | 5.26590000  | 7.14010000  |
| C  | 27.70610000 | 8.74900000  | 5.76700000  |
| C  | 28.08630000 | 10.00960000 | 6.22400000  |
| H  | 27.77760000 | 10.34820000 | 7.20890000  |
| C  | 28.88120000 | 10.83900000 | 5.43470000  |
| H  | 29.17930000 | 11.81450000 | 5.81690000  |
| C  | 29.29380000 | 10.41550000 | 4.17730000  |
| H  | 29.92210000 | 11.05870000 | 3.56140000  |
| C  | 28.90050000 | 9.16420000  | 3.70120000  |
| H  | 29.22290000 | 8.82510000  | 2.71700000  |
| C  | 28.10980000 | 8.33800000  | 4.48860000  |
| H  | 27.79970000 | 7.36600000  | 4.09920000  |
| C  | 25.25600000 | 7.27130000  | 5.74570000  |
| C  | 24.68100000 | 8.32180000  | 5.02250000  |
| H  | 25.18080000 | 9.29180000  | 4.98310000  |
| C  | 23.46810000 | 8.14160000  | 4.36620000  |
| H  | 23.02730000 | 8.96870000  | 3.81050000  |
| C  | 22.81690000 | 6.91200000  | 4.42420000  |
| H  | 21.86420000 | 6.77330000  | 3.91400000  |

|   |             |             |             |
|---|-------------|-------------|-------------|
| C | 23.38300000 | 5.86210000  | 5.14250000  |
| H | 22.87740000 | 4.89830000  | 5.19570000  |
| C | 24.59350000 | 6.04070000  | 5.80490000  |
| H | 25.00710000 | 5.21420000  | 6.38550000  |
| C | 30.46620000 | 6.74990000  | 6.57610000  |
| C | 31.19220000 | 7.91830000  | 6.80290000  |
| H | 31.01850000 | 8.50140000  | 7.70570000  |
| C | 32.13950000 | 8.34990000  | 5.87530000  |
| H | 32.69510000 | 9.26780000  | 6.06410000  |
| C | 32.36890000 | 7.61360000  | 4.71900000  |
| H | 33.10970000 | 7.95170000  | 3.99470000  |
| C | 31.65350000 | 6.43830000  | 4.48840000  |
| H | 31.83820000 | 5.85230000  | 3.58830000  |
| C | 30.71110000 | 6.00760000  | 5.41250000  |
| H | 30.16980000 | 5.07540000  | 5.23600000  |
| C | 29.70300000 | 4.40770000  | 7.99050000  |
| C | 31.05360000 | 4.15100000  | 8.26240000  |
| H | 31.77960000 | 4.96670000  | 8.23070000  |
| C | 31.47640000 | 2.86480000  | 8.57380000  |
| H | 32.52930000 | 2.67910000  | 8.78390000  |
| C | 30.55590000 | 1.81910000  | 8.62150000  |
| H | 30.88640000 | 0.81100000  | 8.86900000  |
| C | 29.21230000 | 2.06820000  | 8.36350000  |
| H | 28.48440000 | 1.25910000  | 8.41340000  |
| C | 28.78460000 | 3.35720000  | 8.05370000  |
| H | 27.71940000 | 3.53150000  | 7.89470000  |
| C | 22.84230000 | 8.41000000  | 12.36500000 |
| C | 22.72010000 | 7.27130000  | 11.56750000 |
| H | 23.59440000 | 6.86650000  | 11.05530000 |
| C | 21.48180000 | 6.65130000  | 11.41560000 |
| H | 21.39760000 | 5.76210000  | 10.79150000 |
| C | 20.36150000 | 7.17140000  | 12.05660000 |
| H | 19.39150000 | 6.68950000  | 11.93490000 |
| C | 20.47730000 | 8.30770000  | 12.85560000 |
| H | 19.60040000 | 8.71340000  | 13.36000000 |
| C | 21.71490000 | 8.92430000  | 13.01430000 |
| H | 21.79910000 | 9.80830000  | 13.65110000 |
| C | 24.55570000 | 9.94660000  | 14.67150000 |
| C | 25.01980000 | 9.04320000  | 15.63240000 |
| H | 25.47640000 | 8.09820000  | 15.32630000 |
| C | 24.90570000 | 9.33980000  | 16.98810000 |
| H | 25.27240000 | 8.63150000  | 17.73070000 |
| C | 24.33110000 | 10.54320000 | 17.39000000 |
| H | 24.24680000 | 10.77820000 | 18.45100000 |
| C | 23.86800000 | 11.44820000 | 16.43840000 |
| H | 23.42070000 | 12.39110000 | 16.75340000 |
| C | 23.97850000 | 11.15210000 | 15.08100000 |
| H | 23.61750000 | 11.86990000 | 14.34020000 |
| C | 24.29590000 | 11.27990000 | 11.69430000 |
| C | 23.25490000 | 11.40710000 | 10.77060000 |

|   |             |             |             |
|---|-------------|-------------|-------------|
| H | 22.59730000 | 10.56200000 | 10.55710000 |
| C | 23.05020000 | 12.61910000 | 10.11430000 |
| H | 22.23870000 | 12.71220000 | 9.39270000  |
| C | 23.87730000 | 13.70670000 | 10.38210000 |
| H | 23.71520000 | 14.65430000 | 9.86850000  |
| C | 24.91240000 | 13.58630000 | 11.30630000 |
| H | 25.56110000 | 14.43600000 | 11.51760000 |
| C | 25.12630000 | 12.37470000 | 11.95770000 |
| H | 25.94430000 | 12.29110000 | 12.67780000 |

---

Coordinates: **A\_alt**

|    |             |             |             |
|----|-------------|-------------|-------------|
| Os | 26.27800000 | 7.92370000  | 9.23160000  |
| Os | 29.08930000 | 7.02110000  | 9.70630000  |
| Os | 27.38160000 | 7.91930000  | 11.99810000 |
| Sb | 25.89050000 | 5.73280000  | 12.80910000 |
| P  | 26.69930000 | 7.67080000  | 6.90430000  |
| P  | 29.28400000 | 6.13790000  | 7.51490000  |
| C  | 26.60860000 | 9.83930000  | 9.51120000  |
| C  | 24.40000000 | 8.24000000  | 9.20860000  |
| C  | 26.04150000 | 5.99360000  | 9.23040000  |
| C  | 29.44350000 | 8.88720000  | 9.21930000  |
| C  | 30.87140000 | 6.74170000  | 10.32260000 |
| C  | 28.50770000 | 5.28300000  | 10.37740000 |
| C  | 28.46620000 | 9.46380000  | 11.73900000 |
| C  | 28.37890000 | 7.54560000  | 13.58650000 |
| C  | 25.85470000 | 8.94890000  | 12.56050000 |
| O  | 26.70930000 | 10.97700000 | 9.68180000  |
| O  | 23.24960000 | 8.36170000  | 9.14960000  |
| O  | 25.86990000 | 4.85790000  | 9.07300000  |
| O  | 29.73220000 | 9.96700000  | 8.92450000  |
| O  | 31.96790000 | 6.58370000  | 10.65770000 |
| O  | 28.23440000 | 4.20860000  | 10.70780000 |
| O  | 29.09650000 | 10.42960000 | 11.74970000 |
| O  | 28.95590000 | 7.36740000  | 14.57340000 |
| O  | 24.98820000 | 9.64190000  | 12.87500000 |
| C  | 27.68150000 | 6.12720000  | 6.57870000  |
| H  | 27.82150000 | 5.93170000  | 5.50510000  |
| H  | 27.08790000 | 5.30080000  | 6.98910000  |
| C  | 27.60510000 | 8.90760000  | 5.90220000  |
| C  | 27.94980000 | 10.15190000 | 6.42620000  |
| H  | 27.65210000 | 10.41650000 | 7.43710000  |
| C  | 28.69700000 | 11.05530000 | 5.67300000  |
| H  | 28.97270000 | 12.01510000 | 6.10770000  |
| C  | 29.09750000 | 10.72030000 | 4.38500000  |
| H  | 29.69240000 | 11.41980000 | 3.79790000  |
| C  | 28.73120000 | 9.49000000  | 3.83870000  |
| H  | 29.03770000 | 9.22520000  | 2.82700000  |
| C  | 27.98860000 | 8.59050000  | 4.59110000  |

|   |             |            |             |
|---|-------------|------------|-------------|
| H | 27.70630000 | 7.63210000 | 4.15110000  |
| C | 25.16840000 | 7.38290000 | 5.93830000  |
| C | 24.59600000 | 8.43490000 | 5.21640000  |
| H | 25.12530000 | 9.38530000 | 5.12880000  |
| C | 23.35180000 | 8.27910000 | 4.61200000  |
| H | 22.91650000 | 9.10770000 | 4.05400000  |
| C | 22.66550000 | 7.07360000 | 4.72350000  |
| H | 21.69050000 | 6.95330000 | 4.25220000  |
| C | 23.22650000 | 6.02290000 | 5.44610000  |
| H | 22.69370000 | 5.07720000 | 5.54370000  |
| C | 24.46730000 | 6.17590000 | 6.05500000  |
| H | 24.87180000 | 5.34890000 | 6.64070000  |
| C | 30.45680000 | 6.83980000 | 6.28900000  |
| C | 31.25760000 | 7.94060000 | 6.58850000  |
| H | 31.20640000 | 8.39750000 | 7.57490000  |
| C | 32.13240000 | 8.45660000 | 5.63310000  |
| H | 32.74720000 | 9.32130000 | 5.88030000  |
| C | 32.22080000 | 7.86590000 | 4.37810000  |
| H | 32.90730000 | 8.26730000 | 3.63300000  |
| C | 31.43980000 | 6.74930000 | 4.07730000  |
| H | 31.51840000 | 6.27300000 | 3.10020000  |
| C | 30.56450000 | 6.23960000 | 5.02680000  |
| H | 29.97040000 | 5.35400000 | 4.78950000  |
| C | 29.80210000 | 4.38090000 | 7.53610000  |
| C | 31.16720000 | 4.12510000 | 7.72450000  |
| H | 31.87610000 | 4.95600000 | 7.75270000  |
| C | 31.62590000 | 2.82300000 | 7.87500000  |
| H | 32.69000000 | 2.63940000 | 8.02050000  |
| C | 30.72630000 | 1.75820000 | 7.84340000  |
| H | 31.08530000 | 0.73660000 | 7.96380000  |
| C | 29.36980000 | 2.00470000 | 7.66390000  |
| H | 28.65990000 | 1.17850000 | 7.64550000  |
| C | 28.90620000 | 3.31040000 | 7.51360000  |
| H | 27.83460000 | 3.47610000 | 7.39900000  |
| C | 26.83870000 | 4.10210000 | 13.81690000 |
| C | 28.22730000 | 3.95190000 | 13.80600000 |
| H | 28.85660000 | 4.63780000 | 13.23540000 |
| C | 28.82480000 | 2.92050000 | 14.52770000 |
| H | 29.90910000 | 2.81270000 | 14.51740000 |
| C | 28.03870000 | 2.03430000 | 15.25820000 |
| H | 28.50830000 | 1.22720000 | 15.82040000 |
| C | 26.65350000 | 2.18210000 | 15.27810000 |
| H | 26.03730000 | 1.49500000 | 15.85800000 |
| C | 26.05460000 | 3.21720000 | 14.56570000 |
| H | 24.96890000 | 3.33670000 | 14.60300000 |
| C | 24.67520000 | 6.37420000 | 14.46110000 |
| C | 25.30450000 | 6.99950000 | 15.54380000 |
| H | 26.38530000 | 7.16180000 | 15.54190000 |
| C | 24.56160000 | 7.42220000 | 16.64220000 |
| H | 25.06240000 | 7.90940000 | 17.47870000 |

|   |             |            |             |
|---|-------------|------------|-------------|
| C | 23.18260000 | 7.22610000 | 16.66800000 |
| H | 22.59990000 | 7.56080000 | 17.52610000 |
| C | 22.55110000 | 6.59880000 | 15.59890000 |
| H | 21.47270000 | 6.43990000 | 15.61720000 |
| C | 23.29440000 | 6.17040000 | 14.49950000 |
| H | 22.78730000 | 5.67250000 | 13.67070000 |
| C | 24.37730000 | 4.75090000 | 11.67230000 |
| C | 24.44100000 | 3.38470000 | 11.39660000 |
| H | 25.24360000 | 2.77550000 | 11.81790000 |
| C | 23.49030000 | 2.79920000 | 10.56260000 |
| H | 23.54350000 | 1.73200000 | 10.34690000 |
| C | 22.48200000 | 3.57590000 | 9.99710000  |
| H | 21.74490000 | 3.11600000 | 9.33870000  |
| C | 22.41560000 | 4.94160000 | 10.26780000 |
| H | 21.63480000 | 5.55760000 | 9.82160000  |
| C | 23.36200000 | 5.52840000 | 11.10410000 |
| H | 23.31250000 | 6.60540000 | 11.29190000 |

---

Coordinates: **B**

|    |             |             |             |
|----|-------------|-------------|-------------|
| Os | 10.00500000 | 9.44020000  | 9.89590000  |
| Os | 12.09740000 | 11.35370000 | 10.56800000 |
| Os | 10.31290000 | 11.88000000 | 8.39480000  |
| Sb | 8.18770000  | 12.02250000 | 6.73830000  |
| P  | 11.56090000 | 7.67980000  | 10.19590000 |
| P  | 13.15040000 | 9.91920000  | 8.99990000  |
| C  | 8.57540000  | 8.28970000  | 9.37270000  |
| C  | 9.46830000  | 9.59230000  | 11.72570000 |
| C  | 13.27330000 | 12.87090000 | 10.31060000 |
| C  | 12.93030000 | 10.41950000 | 12.02050000 |
| C  | 10.79710000 | 12.24670000 | 11.70210000 |
| C  | 11.54740000 | 12.77270000 | 7.30230000  |
| C  | 9.94090000  | 13.50610000 | 9.22080000  |
| O  | 7.73800000  | 7.53640000  | 9.10170000  |
| O  | 9.11950000  | 9.70800000  | 12.82240000 |
| O  | 13.97780000 | 13.77030000 | 10.14500000 |
| O  | 13.43240000 | 9.81870000  | 12.87440000 |
| O  | 10.03380000 | 12.76350000 | 12.39210000 |
| O  | 12.33970000 | 13.30250000 | 6.63750000  |
| O  | 9.70800000  | 14.52190000 | 9.72430000  |
| C  | 13.26730000 | 8.20080000  | 9.66920000  |
| H  | 13.89520000 | 8.26490000  | 10.56940000 |
| H  | 13.71960000 | 7.48240000  | 8.96930000  |
| C  | 12.14400000 | 9.65760000  | 7.50670000  |
| C  | 10.75700000 | 9.54220000  | 7.78210000  |
| C  | 9.95890000  | 9.13280000  | 6.68040000  |
| H  | 8.88300000  | 8.99240000  | 6.82160000  |
| C  | 10.49000000 | 8.87650000  | 5.42330000  |
| H  | 9.83210000  | 8.57100000  | 4.60820000  |

|   |             |             |             |
|---|-------------|-------------|-------------|
| C | 11.85990000 | 9.03720000  | 5.19540000  |
| H | 12.27490000 | 8.86020000  | 4.20240000  |
| C | 12.69390000 | 9.42130000  | 6.23880000  |
| H | 13.76770000 | 9.53030000  | 6.07710000  |
| C | 14.84860000 | 10.26140000 | 8.41070000  |
| C | 15.92550000 | 9.40350000  | 8.65310000  |
| H | 15.77440000 | 8.46100000  | 9.17920000  |
| C | 17.20890000 | 9.74560000  | 8.23200000  |
| H | 18.04010000 | 9.07030000  | 8.43350000  |
| C | 17.42670000 | 10.94280000 | 7.55860000  |
| H | 18.43110000 | 11.20990000 | 7.23100000  |
| C | 16.35870000 | 11.80290000 | 7.30870000  |
| H | 16.52130000 | 12.74530000 | 6.78700000  |
| C | 15.08000000 | 11.46910000 | 7.73800000  |
| H | 14.25490000 | 12.15740000 | 7.54640000  |
| C | 11.80520000 | 6.92920000  | 11.84720000 |
| C | 10.71290000 | 6.82500000  | 12.71330000 |
| H | 9.74150000  | 7.21540000  | 12.41060000 |
| C | 10.85150000 | 6.21760000  | 13.95760000 |
| H | 9.99190000  | 6.15320000  | 14.62350000 |
| C | 12.08550000 | 5.70810000  | 14.34950000 |
| H | 12.19990000 | 5.24560000  | 15.32940000 |
| C | 13.17420000 | 5.78630000  | 13.48440000 |
| H | 14.14040000 | 5.38010000  | 13.78200000 |
| C | 13.03340000 | 6.38560000  | 12.23770000 |
| H | 13.89290000 | 6.42130000  | 11.56720000 |
| C | 11.23270000 | 6.20760000  | 9.14510000  |
| C | 11.55810000 | 6.21760000  | 7.78470000  |
| H | 12.09220000 | 7.06290000  | 7.34740000  |
| C | 11.19450000 | 5.15600000  | 6.96340000  |
| H | 11.45560000 | 5.18470000  | 5.90510000  |
| C | 10.49910000 | 4.07060000  | 7.48960000  |
| H | 10.21280000 | 3.23890000  | 6.84640000  |
| C | 10.17220000 | 4.05180000  | 8.84250000  |
| H | 9.63080000  | 3.20540000  | 9.26420000  |
| C | 10.53510000 | 5.11320000  | 9.66630000  |
| H | 10.27310000 | 5.08740000  | 10.72520000 |
| C | 6.64980000  | 10.55020000 | 6.92860000  |
| C | 6.32200000  | 9.67690000  | 5.88750000  |
| H | 6.81440000  | 9.77060000  | 4.91570000  |
| C | 5.36600000  | 8.68220000  | 6.08430000  |
| H | 5.11650000  | 8.00130000  | 5.27050000  |
| C | 4.73010000  | 8.55980000  | 7.31690000  |
| H | 3.98330000  | 7.78090000  | 7.46890000  |
| C | 5.05290000  | 9.42580000  | 8.35900000  |
| H | 4.56630000  | 9.32220000  | 9.32860000  |
| C | 6.01910000  | 10.41020000 | 8.17050000  |
| H | 6.28760000  | 11.06590000 | 9.00370000  |
| C | 8.54310000  | 12.01380000 | 4.62950000  |
| C | 9.84350000  | 11.82990000 | 4.15380000  |



|   |             |             |            |
|---|-------------|-------------|------------|
| H | 10.66670000 | 11.67420000 | 4.85540000 |
| C | 10.09710000 | 11.83260000 | 2.78370000 |
| H | 11.11500000 | 11.68720000 | 2.42050000 |
| C | 9.05160000  | 12.02460000 | 1.88470000 |
| H | 9.24870000  | 12.02690000 | 0.81270000 |
| C | 7.75360000  | 12.22300000 | 2.35270000 |
| H | 6.93800000  | 12.38340000 | 1.64760000 |
| C | 7.49920000  | 12.22230000 | 3.72160000 |
| H | 6.48110000  | 12.39100000 | 4.08230000 |
| C | 7.02050000  | 13.80900000 | 6.84620000 |
| C | 7.69310000  | 15.03230000 | 6.75520000 |
| H | 8.78170000  | 15.05980000 | 6.65260000 |
| C | 6.98070000  | 16.22750000 | 6.78740000 |
| H | 7.51070000  | 17.17730000 | 6.71890000 |
| C | 5.59340000  | 16.20690000 | 6.91110000 |
| H | 5.03580000  | 17.14280000 | 6.93990000 |
| C | 4.91810000  | 14.99230000 | 6.99700000 |
| H | 3.83230000  | 14.97580000 | 7.09060000 |
| C | 5.62860000  | 13.79370000 | 6.96360000 |
| H | 5.09150000  | 12.84480000 | 7.02850000 |
| H | 9.06670000  | 10.95150000 | 9.52930000 |

---

Coordinates: **C**

|    |             |             |             |
|----|-------------|-------------|-------------|
| Os | 10.40810000 | 15.99680000 | 7.87420000  |
| Os | 12.59910000 | 15.59510000 | 5.48510000  |
| Os | 10.30270000 | 15.43860000 | 3.53600000  |
| Sb | 8.85760000  | 15.09720000 | 5.87550000  |
| Sb | 8.21730000  | 15.10960000 | 1.89610000  |
| P  | 12.26650000 | 16.35820000 | 9.29630000  |
| P  | 14.31750000 | 15.47840000 | 7.12840000  |
| C  | 9.21930000  | 15.41400000 | 9.23280000  |
| C  | 9.78050000  | 17.83910000 | 7.94420000  |
| C  | 13.63370000 | 14.69610000 | 4.19290000  |
| C  | 12.92600000 | 17.37690000 | 4.77470000  |
| C  | 9.99620000  | 17.31240000 | 4.01510000  |
| C  | 11.60980000 | 15.92110000 | 2.22730000  |
| C  | 10.83480000 | 13.55430000 | 3.45630000  |
| O  | 8.50840000  | 15.05080000 | 10.06850000 |
| O  | 9.42010000  | 18.93450000 | 8.02380000  |
| O  | 14.26630000 | 14.16190000 | 3.38260000  |
| O  | 13.07690000 | 18.46000000 | 4.39570000  |
| O  | 9.82970000  | 18.40400000 | 4.34150000  |
| O  | 12.42700000 | 16.23710000 | 1.47480000  |
| O  | 11.15510000 | 12.45280000 | 3.35910000  |
| C  | 11.14880000 | 13.96370000 | 7.60690000  |
| C  | 12.00130000 | 13.76990000 | 6.49620000  |
| C  | 12.48440000 | 12.47470000 | 6.23930000  |
| H  | 13.14900000 | 12.29560000 | 5.38690000  |

|   |             |             |             |
|---|-------------|-------------|-------------|
| C | 12.16060000 | 11.39430000 | 7.06140000  |
| H | 12.55810000 | 10.40210000 | 6.83760000  |
| C | 11.34850000 | 11.59650000 | 8.17450000  |
| H | 11.08250000 | 10.76130000 | 8.82530000  |
| C | 10.83910000 | 12.87090000 | 8.43310000  |
| H | 10.17090000 | 12.99780000 | 9.29150000  |
| C | 13.69450000 | 15.28180000 | 8.85760000  |
| H | 14.49910000 | 15.35580000 | 9.60280000  |
| H | 13.28310000 | 14.26460000 | 8.88540000  |
| C | 11.92510000 | 15.93410000 | 11.03470000 |
| C | 11.19010000 | 16.84430000 | 11.80560000 |
| H | 10.94740000 | 17.82920000 | 11.39930000 |
| C | 10.75630000 | 16.49620000 | 13.07880000 |
| H | 10.18540000 | 17.21190000 | 13.66940000 |
| C | 11.03950000 | 15.23150000 | 13.59190000 |
| H | 10.69180000 | 14.95580000 | 14.58700000 |
| C | 11.75920000 | 14.31900000 | 12.82770000 |
| H | 11.97710000 | 13.32640000 | 13.22070000 |
| C | 12.20090000 | 14.66580000 | 11.55290000 |
| H | 12.74480000 | 13.92930000 | 10.95960000 |
| C | 13.02870000 | 18.02070000 | 9.35490000  |
| C | 12.92820000 | 18.85460000 | 8.23720000  |
| H | 12.31380000 | 18.55260000 | 7.38790000  |
| C | 13.63060000 | 20.05560000 | 8.18730000  |
| H | 13.55500000 | 20.68380000 | 7.30010000  |
| C | 14.42420000 | 20.44030000 | 9.26340000  |
| H | 14.97570000 | 21.37950000 | 9.22640000  |
| C | 14.51500000 | 19.62420000 | 10.39030000 |
| H | 15.13100000 | 19.92700000 | 11.23710000 |
| C | 13.82670000 | 18.41700000 | 10.43510000 |
| H | 13.91040000 | 17.77520000 | 11.31470000 |
| C | 15.43000000 | 14.02480000 | 6.96390000  |
| C | 15.26920000 | 12.85230000 | 7.70670000  |
| H | 14.50150000 | 12.77290000 | 8.47540000  |
| C | 16.07320000 | 11.74340000 | 7.45750000  |
| H | 15.92430000 | 10.83450000 | 8.04030000  |
| C | 17.04570000 | 11.79030000 | 6.46450000  |
| H | 17.66820000 | 10.91850000 | 6.26510000  |
| C | 17.22110000 | 12.95790000 | 5.72520000  |
| H | 17.98270000 | 13.00880000 | 4.94790000  |
| C | 16.42130000 | 14.06670000 | 5.97520000  |
| H | 16.57510000 | 14.97640000 | 5.39180000  |
| C | 15.55160000 | 16.84180000 | 7.21410000  |
| C | 16.24930000 | 17.14200000 | 8.38890000  |
| H | 16.05610000 | 16.58990000 | 9.30830000  |
| C | 17.18880000 | 18.16670000 | 8.41220000  |
| H | 17.70540000 | 18.40090000 | 9.34320000  |
| C | 17.46520000 | 18.89070000 | 7.25540000  |
| H | 18.19930000 | 19.69580000 | 7.27670000  |
| C | 16.80370000 | 18.57770000 | 6.07230000  |

|   |             |             |             |
|---|-------------|-------------|-------------|
| H | 17.01940000 | 19.12850000 | 5.15730000  |
| C | 15.85300000 | 17.56150000 | 6.05420000  |
| H | 15.33900000 | 17.32330000 | 5.12350000  |
| C | 6.94500000  | 16.10040000 | 5.71820000  |
| C | 6.86860000  | 17.46900000 | 6.00730000  |
| H | 7.75040000  | 18.01230000 | 6.34990000  |
| C | 5.66820000  | 18.16390000 | 5.86660000  |
| H | 5.63080000  | 19.22800000 | 6.10190000  |
| C | 4.52380000  | 17.49810000 | 5.43330000  |
| H | 3.58320000  | 18.03820000 | 5.32340000  |
| C | 4.58660000  | 16.13790000 | 5.14340000  |
| H | 3.69580000  | 15.60780000 | 4.80330000  |
| C | 5.78690000  | 15.44240000 | 5.28510000  |
| H | 5.80840000  | 14.37480000 | 5.05280000  |
| C | 8.12760000  | 13.14000000 | 6.36680000  |
| C | 7.04110000  | 13.02920000 | 7.24080000  |
| H | 6.52330000  | 13.92400000 | 7.59410000  |
| C | 6.60710000  | 11.77700000 | 7.67110000  |
| H | 5.75800000  | 11.70410000 | 8.35100000  |
| C | 7.26120000  | 10.62470000 | 7.24080000  |
| H | 6.92580000  | 9.64590000  | 7.58470000  |
| C | 8.35320000  | 10.72900000 | 6.38290000  |
| H | 8.89210000  | 9.83620000  | 6.06340000  |
| C | 8.78500000  | 11.98050000 | 5.94970000  |
| H | 9.66800000  | 12.03840000 | 5.31230000  |
| C | 7.05280000  | 16.80190000 | 1.31270000  |
| C | 6.59630000  | 17.67890000 | 2.30260000  |
| H | 6.84120000  | 17.51240000 | 3.35560000  |
| C | 5.81290000  | 18.77580000 | 1.95430000  |
| H | 5.45760000  | 19.45160000 | 2.73270000  |
| C | 5.48710000  | 19.00480000 | 0.61970000  |
| H | 4.87740000  | 19.86650000 | 0.34790000  |
| C | 5.94040000  | 18.13470000 | -0.36880000 |
| H | 5.68740000  | 18.31500000 | -1.41370000 |
| C | 6.72060000  | 17.03260000 | -0.02530000 |
| H | 7.07230000  | 16.35410000 | -0.80560000 |
| C | 6.64940000  | 13.76790000 | 2.45920000  |
| C | 6.98740000  | 12.58790000 | 3.12680000  |
| H | 8.03260000  | 12.34990000 | 3.33930000  |
| C | 5.99340000  | 11.70990000 | 3.55290000  |
| H | 6.26970000  | 10.80950000 | 4.10260000  |
| C | 4.65610000  | 12.00030000 | 3.29380000  |
| H | 3.87640000  | 11.31730000 | 3.63080000  |
| C | 4.31350000  | 13.16460000 | 2.60820000  |
| H | 3.26640000  | 13.39070000 | 2.40400000  |
| C | 5.30600000  | 14.05330000 | 2.19880000  |
| H | 5.02710000  | 14.97890000 | 1.68870000  |
| C | 8.67350000  | 14.26300000 | -0.01640000 |
| C | 7.68690000  | 13.57810000 | -0.73470000 |
| H | 6.68580000  | 13.45450000 | -0.31390000 |

|   |             |             |             |
|---|-------------|-------------|-------------|
| C | 7.97680000  | 13.04250000 | -1.98700000 |
| H | 7.20380000  | 12.50930000 | -2.54040000 |
| C | 9.25360000  | 13.18240000 | -2.52640000 |
| H | 9.48000000  | 12.75930000 | -3.50500000 |
| C | 10.24100000 | 13.85780000 | -1.81500000 |
| H | 11.24160000 | 13.96620000 | -2.23300000 |
| C | 9.95240000  | 14.39740000 | -0.56290000 |
| H | 10.73700000 | 14.92430000 | -0.01700000 |
| H | 11.52390000 | 16.61190000 | 6.58270000  |

---

Coordinates: **D**

|    |             |             |            |
|----|-------------|-------------|------------|
| Os | 2.81130000  | 3.04470000  | 4.47040000 |
| Os | 5.52120000  | 3.17770000  | 5.95710000 |
| Os | 5.23510000  | 0.15000000  | 6.71220000 |
| Sb | 3.44210000  | 0.44260000  | 4.70560000 |
| Sb | 6.97970000  | 0.49910000  | 8.73720000 |
| P  | 2.33060000  | 5.32530000  | 4.72550000 |
| P  | 5.39490000  | 5.46400000  | 5.37270000 |
| C  | 1.75380000  | 2.65390000  | 6.06250000 |
| C  | 3.82000000  | 3.36790000  | 2.83980000 |
| C  | 4.32710000  | 3.51000000  | 7.45610000 |
| C  | 7.26110000  | 3.38700000  | 6.69820000 |
| C  | 6.18710000  | 2.57670000  | 4.21940000 |
| C  | 3.82500000  | 0.57700000  | 8.01420000 |
| C  | 4.99780000  | -1.72800000 | 6.86650000 |
| C  | 6.63920000  | -0.05350000 | 5.35210000 |
| O  | 1.07250000  | 2.40350000  | 6.95760000 |
| O  | 4.36460000  | 3.56470000  | 1.83890000 |
| O  | 3.65880000  | 3.79950000  | 8.36400000 |
| O  | 8.34190000  | 3.64130000  | 7.04080000 |
| O  | 6.62500000  | 2.22500000  | 3.20880000 |
| O  | 3.03090000  | 0.74360000  | 8.83090000 |
| O  | 4.85140000  | -2.87430000 | 6.91800000 |
| O  | 7.45660000  | -0.24920000 | 4.56750000 |
| C  | 1.08410000  | 2.59270000  | 3.28230000 |
| C  | -0.23160000 | 2.76460000  | 3.75490000 |
| H  | -0.40640000 | 3.18190000  | 4.75000000 |
| C  | -1.35120000 | 2.41160000  | 3.00190000 |
| H  | -2.34580000 | 2.55620000  | 3.42800000 |
| C  | -1.20840000 | 1.87420000  | 1.72610000 |
| H  | -2.08200000 | 1.59530000  | 1.13670000 |
| C  | 0.07700000  | 1.70630000  | 1.21820000 |
| H  | 0.22370000  | 1.28950000  | 0.22000000 |
| C  | 6.45630000  | 6.33000000  | 7.83330000 |
| H  | 6.06180000  | 5.39780000  | 8.24620000 |
| C  | 1.19110000  | 2.05640000  | 1.98140000 |
| H  | 2.17570000  | 1.88530000  | 1.53730000 |
| C  | 3.73040000  | 6.25930000  | 5.52790000 |

|   |             |             |             |
|---|-------------|-------------|-------------|
| H | 3.77480000  | 7.31780000  | 5.22830000  |
| H | 3.54600000  | 6.25730000  | 6.61300000  |
| C | 0.91240000  | 5.71410000  | 5.82510000  |
| C | 1.03300000  | 5.63470000  | 7.21680000  |
| H | 1.98850000  | 5.39510000  | 7.68640000  |
| C | -0.07970000 | 5.81550000  | 8.03170000  |
| H | 0.03210000  | 5.74770000  | 9.11330000  |
| C | -1.32840000 | 6.06250000  | 7.46850000  |
| H | -2.19980000 | 6.19760000  | 8.10860000  |
| C | -1.46110000 | 6.12600000  | 6.08420000  |
| H | -2.43630000 | 6.30830000  | 5.63320000  |
| C | -0.34900000 | 5.95250000  | 5.26600000  |
| H | -0.46540000 | 5.99750000  | 4.18230000  |
| C | 1.93930000  | 6.35210000  | 3.25440000  |
| C | 1.78060000  | 5.76040000  | 2.00090000  |
| H | 1.83430000  | 4.67610000  | 1.90610000  |
| C | 1.53370000  | 6.54830000  | 0.87760000  |
| H | 1.41370000  | 6.07230000  | -0.09500000 |
| C | 1.43800000  | 7.92980000  | 1.00070000  |
| H | 1.25000000  | 8.54560000  | 0.12140000  |
| C | 1.56470000  | 8.52750000  | 2.25540000  |
| H | 1.46990000  | 9.60810000  | 2.36010000  |
| C | 1.80450000  | 7.74240000  | 3.37650000  |
| H | 1.88170000  | 8.21600000  | 4.35780000  |
| C | 6.33440000  | 6.60910000  | 6.46740000  |
| C | 6.86870000  | 7.80040000  | 5.96500000  |
| H | 6.78130000  | 8.02900000  | 4.90160000  |
| C | 7.51710000  | 8.69450000  | 6.81150000  |
| H | 7.93450000  | 9.61610000  | 6.40630000  |
| C | 7.63210000  | 8.41090000  | 8.16960000  |
| H | 8.14200000  | 9.10980000  | 8.83240000  |
| C | 7.09900000  | 7.22950000  | 8.67770000  |
| H | 7.19150000  | 6.99130000  | 9.73740000  |
| C | 6.01150000  | 5.90250000  | 3.71100000  |
| C | 5.30100000  | 6.70100000  | 2.81250000  |
| H | 4.33950000  | 7.13110000  | 3.08680000  |
| C | 5.80560000  | 6.94820000  | 1.53770000  |
| H | 5.22360000  | 7.55380000  | 0.84290000  |
| C | 7.03360000  | 6.41880000  | 1.15840000  |
| H | 7.42440000  | 6.60390000  | 0.15830000  |
| C | 7.76860000  | 5.65380000  | 2.06360000  |
| H | 8.73690000  | 5.24480000  | 1.77770000  |
| C | 7.26080000  | 5.39730000  | 3.33030000  |
| H | 7.83880000  | 4.79220000  | 4.03240000  |
| C | 1.70120000  | -0.75030000 | 5.12740000  |
| C | 1.51160000  | -1.44070000 | 6.32570000  |
| H | 2.28780000  | -1.44510000 | 7.09290000  |
| C | 0.32580000  | -2.13560000 | 6.56160000  |
| H | 0.19040000  | -2.66940000 | 7.50250000  |
| C | -0.68050000 | -2.14210000 | 5.60050000  |

|   |             |             |             |
|---|-------------|-------------|-------------|
| H | -1.60970000 | -2.68060000 | 5.78760000  |
| C | -0.49990000 | -1.45600000 | 4.40150000  |
| H | -1.28590000 | -1.44640000 | 3.64580000  |
| C | 0.68440000  | -0.76420000 | 4.16410000  |
| H | 0.80250000  | -0.21790000 | 3.22480000  |
| C | 4.19440000  | -0.67420000 | 3.03500000  |
| C | 4.25560000  | -2.06910000 | 3.13400000  |
| H | 3.87870000  | -2.57680000 | 4.02600000  |
| C | 4.79670000  | -2.82200000 | 2.09560000  |
| H | 4.84080000  | -3.90810000 | 2.17990000  |
| C | 5.28080000  | -2.18790000 | 0.95270000  |
| H | 5.70700000  | -2.77790000 | 0.14120000  |
| C | 5.22120000  | -0.80150000 | 0.84880000  |
| H | 5.60080000  | -0.30080000 | -0.04190000 |
| C | 4.67960000  | -0.04480000 | 1.88700000  |
| H | 4.65170000  | 1.04150000  | 1.79470000  |
| C | 6.69790000  | -0.88480000 | 10.34560000 |
| C | 6.64110000  | -0.46220000 | 11.67640000 |
| H | 6.72510000  | 0.59880000  | 11.92010000 |
| C | 6.47540000  | -1.39440000 | 12.69920000 |
| H | 6.42800000  | -1.05880000 | 13.73520000 |
| C | 6.37220000  | -2.74990000 | 12.39910000 |
| H | 6.24190000  | -3.47740000 | 13.20010000 |
| C | 6.43420000  | -3.17810000 | 11.07490000 |
| H | 6.35430000  | -4.23850000 | 10.83660000 |
| C | 6.59470000  | -2.24890000 | 10.05070000 |
| H | 6.64050000  | -2.59710000 | 9.01600000  |
| C | 9.07000000  | 0.23920000  | 8.39920000  |
| C | 9.88180000  | -0.27040000 | 9.41820000  |
| H | 9.44700000  | -0.56010000 | 10.37780000 |
| C | 11.25160000 | -0.41250000 | 9.21140000  |
| H | 11.88120000 | -0.81100000 | 10.00680000 |
| C | 11.81450000 | -0.04850000 | 7.99030000  |
| H | 12.88650000 | -0.16260000 | 7.83030000  |
| C | 11.01020000 | 0.45960000  | 6.97360000  |
| H | 11.44750000 | 0.74560000  | 6.01750000  |
| C | 9.64000000  | 0.60500000  | 7.17610000  |
| H | 9.02190000  | 1.00990000  | 6.37370000  |
| C | 6.97370000  | 2.31450000  | 9.86920000  |
| C | 5.76660000  | 2.79230000  | 10.38960000 |
| H | 4.83190000  | 2.25210000  | 10.22560000 |
| C | 5.73690000  | 3.98210000  | 11.11290000 |
| H | 4.78900000  | 4.35040000  | 11.50480000 |
| C | 6.91420000  | 4.69770000  | 11.32010000 |
| H | 6.89270000  | 5.62560000  | 11.89330000 |
| C | 8.11890000  | 4.22780000  | 10.80090000 |
| H | 9.03910000  | 4.79180000  | 10.95430000 |
| C | 8.15110000  | 3.03700000  | 10.07820000 |
| H | 9.09490000  | 2.68290000  | 9.65960000  |

---

Coordinates: **Species D\_alt1**

|    |             |             |            |
|----|-------------|-------------|------------|
| Os | 2.69700000  | 3.01520000  | 4.24720000 |
| Os | 5.44780000  | 3.18130000  | 5.93530000 |
| Os | 5.10360000  | 0.18760000  | 6.77370000 |
| Sb | 3.36270000  | 0.47510000  | 4.72140000 |
| Sb | 6.93360000  | 0.45730000  | 8.73800000 |
| P  | 2.24350000  | 5.30220000  | 4.70930000 |
| P  | 5.31210000  | 5.46580000  | 5.35280000 |
| C  | 1.36030000  | 2.73980000  | 2.95680000 |
| C  | 3.93480000  | 3.37370000  | 2.80860000 |
| C  | 4.42230000  | 3.63440000  | 7.52490000 |
| C  | 7.21140000  | 3.34280000  | 6.62830000 |
| C  | 6.18710000  | 2.52490000  | 4.24110000 |
| C  | 3.76150000  | 0.77290000  | 8.08570000 |
| C  | 4.71150000  | -1.65640000 | 7.00880000 |
| C  | 6.48060000  | -0.15530000 | 5.41100000 |
| O  | 0.60190000  | 2.60940000  | 2.08780000 |
| O  | 4.55670000  | 3.56520000  | 1.84860000 |
| O  | 3.89500000  | 4.02010000  | 8.48410000 |
| O  | 8.31130000  | 3.55700000  | 6.93200000 |
| O  | 6.70920000  | 2.15710000  | 3.28000000 |
| O  | 3.02580000  | 1.03910000  | 8.92960000 |
| O  | 4.45590000  | -2.77870000 | 7.11580000 |
| O  | 7.27290000  | -0.40810000 | 4.61810000 |
| C  | 1.13790000  | 2.48050000  | 5.75510000 |
| C  | 1.16690000  | 2.82210000  | 7.11610000 |
| H  | 2.01920000  | 3.35830000  | 7.52230000 |
| C  | 0.12690000  | 2.53130000  | 8.00060000 |
| H  | 0.22180000  | 2.82840000  | 9.04700000 |
| C  | -1.01600000 | 1.87790000  | 7.55430000 |
| H  | -1.83280000 | 1.64880000  | 8.23970000 |
| C  | -1.09110000 | 1.52260000  | 6.21080000 |
| H  | -1.96950000 | 1.00140000  | 5.82520000 |
| C  | 6.53370000  | 6.28140000  | 7.78440000 |
| H  | 6.27950000  | 5.29740000  | 8.18280000 |
| C  | -0.03890000 | 1.81400000  | 5.34660000 |
| H  | -0.15630000 | 1.48260000  | 4.31270000 |
| C  | 3.63010000  | 6.20070000  | 5.56100000 |
| H  | 3.62700000  | 7.28330000  | 5.35560000 |
| H  | 3.47070000  | 6.07890000  | 6.64320000 |
| C  | 0.78550000  | 5.67810000  | 5.75300000 |
| C  | 0.83880000  | 6.28470000  | 7.00800000 |
| H  | 1.78690000  | 6.60900000  | 7.43750000 |
| C  | -0.32820000 | 6.47970000  | 7.74460000 |
| H  | -0.27110000 | 6.95050000  | 8.72580000 |
| C  | -1.55370000 | 6.06860000  | 7.23470000 |
| H  | -2.46370000 | 6.21180000  | 7.81660000 |
| C  | -1.61640000 | 5.47040000  | 5.97660000 |

|   |             |             |             |
|---|-------------|-------------|-------------|
| H | -2.57110000 | 5.13470000  | 5.57330000  |
| C | -0.45520000 | 5.27520000  | 5.24230000  |
| H | -0.51100000 | 4.79330000  | 4.26360000  |
| C | 1.90420000  | 6.41950000  | 3.28250000  |
| C | 2.01950000  | 5.97840000  | 1.96460000  |
| H | 2.26880000  | 4.94000000  | 1.75690000  |
| C | 1.84150000  | 6.86480000  | 0.90370000  |
| H | 1.93970000  | 6.50290000  | -0.11920000 |
| C | 1.54990000  | 8.20110000  | 1.15290000  |
| H | 1.41810000  | 8.89720000  | 0.32470000  |
| C | 1.41250000  | 8.64870000  | 2.46740000  |
| H | 1.16760000  | 9.69140000  | 2.66870000  |
| C | 1.57860000  | 7.76150000  | 3.52390000  |
| H | 1.45220000  | 8.11360000  | 4.55030000  |
| C | 6.24130000  | 6.61760000  | 6.45800000  |
| C | 6.60230000  | 7.88660000  | 5.98750000  |
| H | 6.39080000  | 8.16290000  | 4.95320000  |
| C | 7.24000000  | 8.79770000  | 6.82200000  |
| H | 7.51940000  | 9.77830000  | 6.43730000  |
| C | 7.52600000  | 8.45380000  | 8.14080000  |
| H | 8.03010000  | 9.16500000  | 8.79470000  |
| C | 7.17110000  | 7.19610000  | 8.61790000  |
| H | 7.39860000  | 6.90830000  | 9.64430000  |
| C | 5.91790000  | 5.96030000  | 3.70550000  |
| C | 5.22160000  | 6.82700000  | 2.86090000  |
| H | 4.26450000  | 7.25060000  | 3.16320000  |
| C | 5.73690000  | 7.15180000  | 1.60810000  |
| H | 5.16630000  | 7.80990000  | 0.95270000  |
| C | 6.96010000  | 6.63120000  | 1.20060000  |
| H | 7.35910000  | 6.87880000  | 0.21740000  |
| C | 7.67930000  | 5.79560000  | 2.05440000  |
| H | 8.64310000  | 5.39330000  | 1.74510000  |
| C | 7.16160000  | 5.46260000  | 3.29920000  |
| H | 7.72700000  | 4.80600000  | 3.96380000  |
| C | 1.68870000  | -0.83040000 | 5.04810000  |
| C | 1.27070000  | -1.19200000 | 6.32860000  |
| H | 1.83280000  | -0.86880000 | 7.20720000  |
| C | 0.11470000  | -1.94810000 | 6.50720000  |
| H | -0.20630000 | -2.21470000 | 7.51420000  |
| C | -0.63300000 | -2.34760000 | 5.40290000  |
| H | -1.54040000 | -2.93540000 | 5.54160000  |
| C | -0.22200000 | -1.99230000 | 4.11960000  |
| H | -0.80590000 | -2.30100000 | 3.25210000  |
| C | 0.93470000  | -1.23700000 | 3.94230000  |
| H | 1.24070000  | -0.95410000 | 2.93100000  |
| C | 4.25100000  | -0.66360000 | 3.12260000  |
| C | 4.37430000  | -2.05140000 | 3.26640000  |
| H | 3.94840000  | -2.55660000 | 4.13700000  |
| C | 5.03250000  | -2.80500000 | 2.29900000  |
| H | 5.12300000  | -3.88460000 | 2.42170000  |



|   |             |             |             |
|---|-------------|-------------|-------------|
| C | 5.57500000  | -2.17960000 | 1.17760000  |
| H | 6.09690000  | -2.76840000 | 0.42310000  |
| C | 5.44550000  | -0.80340000 | 1.02070000  |
| H | 5.86470000  | -0.30860000 | 0.14450000  |
| C | 4.78310000  | -0.04800000 | 1.98820000  |
| H | 4.70420000  | 1.03100000  | 1.85430000  |
| C | 6.65200000  | -0.87420000 | 10.39000000 |
| C | 6.74910000  | -0.42620000 | 11.71070000 |
| H | 6.95920000  | 0.62440000  | 11.92120000 |
| C | 6.57620000  | -1.31940000 | 12.76620000 |
| H | 6.64860000  | -0.96320000 | 13.79390000 |
| C | 6.31060000  | -2.66150000 | 12.50920000 |
| H | 6.17310000  | -3.35830000 | 13.33580000 |
| C | 6.21980000  | -3.11570000 | 11.19540000 |
| H | 6.01240000  | -4.16570000 | 10.99060000 |
| C | 6.38840000  | -2.22510000 | 10.13860000 |
| H | 6.31480000  | -2.59450000 | 9.11320000  |
| C | 8.98560000  | 0.07060000  | 8.30100000  |
| C | 9.79980000  | -0.53230000 | 9.26540000  |
| H | 9.38200000  | -0.83780000 | 10.22760000 |
| C | 11.14960000 | -0.74860000 | 9.00060000  |
| H | 11.78070000 | -1.22070000 | 9.75340000  |
| C | 11.69090000 | -0.36360000 | 7.77620000  |
| H | 12.74740000 | -0.53540000 | 7.57070000  |
| C | 10.88460000 | 0.23830000  | 6.81360000  |
| H | 11.30480000 | 0.54070000  | 5.85500000  |
| C | 9.53400000  | 0.45640000  | 7.07380000  |
| H | 8.91350000  | 0.93260000  | 6.31280000  |
| C | 7.11330000  | 2.28230000  | 9.83880000  |
| C | 5.96980000  | 2.84940000  | 10.41070000 |
| H | 4.99330000  | 2.37330000  | 10.29700000 |
| C | 6.06090000  | 4.03850000  | 11.12960000 |
| H | 5.16120000  | 4.47700000  | 11.56090000 |
| C | 7.29760000  | 4.66100000  | 11.28670000 |
| H | 7.37120000  | 5.58660000  | 11.85920000 |
| C | 8.43980000  | 4.10120000  | 10.71740000 |
| H | 9.40660000  | 4.59080000  | 10.83470000 |
| C | 8.35020000  | 2.91290000  | 9.99540000  |
| H | 9.24710000  | 2.48550000  | 9.54270000  |

---

Coordinates: **D\_alt2**

|    |            |             |            |
|----|------------|-------------|------------|
| Os | 2.91860000 | 2.97030000  | 4.77150000 |
| Os | 5.63150000 | 3.34300000  | 6.20780000 |
| Os | 5.65540000 | 0.33760000  | 7.01600000 |
| Sb | 3.55160000 | 0.39360000  | 5.20980000 |
| Sb | 5.53200000 | -2.22860000 | 7.71090000 |
| P  | 2.39980000 | 5.25410000  | 4.72160000 |
| P  | 5.46420000 | 5.54790000  | 5.38190000 |

|   |             |             |             |
|---|-------------|-------------|-------------|
| C | 1.87010000  | 2.74740000  | 6.39850000  |
| C | 3.95480000  | 3.06840000  | 3.12440000  |
| C | 4.39490000  | 3.81300000  | 7.63750000  |
| C | 7.29730000  | 3.63130000  | 7.09170000  |
| C | 6.41410000  | 2.65510000  | 4.55390000  |
| C | 4.34750000  | 0.98910000  | 8.32610000  |
| C | 7.12610000  | 0.73280000  | 8.18560000  |
| C | 6.81090000  | -0.11310000 | 5.49630000  |
| O | 1.19960000  | 2.57730000  | 7.32120000  |
| O | 4.51290000  | 3.10620000  | 2.11330000  |
| O | 3.73660000  | 4.18890000  | 8.51760000  |
| O | 8.31410000  | 3.89290000  | 7.57930000  |
| O | 6.93170000  | 2.27490000  | 3.59220000  |
| O | 3.57920000  | 1.32450000  | 9.11570000  |
| O | 8.00940000  | 0.95660000  | 8.89260000  |
| O | 7.48240000  | -0.43040000 | 4.61780000  |
| C | 1.21740000  | 2.33630000  | 3.62920000  |
| C | -0.10780000 | 2.60980000  | 4.02200000  |
| H | -0.29960000 | 3.20060000  | 4.92190000  |
| C | -1.21200000 | 2.13500000  | 3.31430000  |
| H | -2.21620000 | 2.37070000  | 3.67190000  |
| C | -1.04100000 | 1.35720000  | 2.17170000  |
| H | -1.90250000 | 0.97930000  | 1.62060000  |
| C | 0.25530000  | 1.07600000  | 1.74780000  |
| H | 0.42770000  | 0.46320000  | 0.86050000  |
| C | 6.44850000  | 6.71350000  | 7.74580000  |
| H | 6.09200000  | 5.80830000  | 8.23970000  |
| C | 1.35370000  | 1.56040000  | 2.45900000  |
| H | 2.34720000  | 1.28820000  | 2.09130000  |
| C | 3.77650000  | 6.31170000  | 5.40370000  |
| H | 3.81010000  | 7.32250000  | 4.96880000  |
| H | 3.57540000  | 6.44490000  | 6.47840000  |
| C | 0.96440000  | 5.77310000  | 5.74490000  |
| C | 1.05750000  | 5.82840000  | 7.13970000  |
| H | 2.00150000  | 5.62300000  | 7.64670000  |
| C | -0.06480000 | 6.11290000  | 7.91060000  |
| H | 0.02690000  | 6.15170000  | 8.99550000  |
| C | -1.29680000 | 6.33220000  | 7.30050000  |
| H | -2.17560000 | 6.55220000  | 7.90610000  |
| C | -1.40300000 | 6.26090000  | 5.91440000  |
| H | -2.36530000 | 6.42090000  | 5.42840000  |
| C | -0.28070000 | 5.98250000  | 5.14020000  |
| H | -0.37540000 | 5.92110000  | 4.05540000  |
| C | 2.01040000  | 6.07360000  | 3.12450000  |
| C | 1.84910000  | 5.31680000  | 1.96280000  |
| H | 1.89180000  | 4.22900000  | 2.01830000  |
| C | 1.61720000  | 5.94670000  | 0.74100000  |
| H | 1.50060000  | 5.34390000  | -0.15880000 |
| C | 1.53410000  | 7.33330000  | 0.67390000  |
| H | 1.36120000  | 7.82470000  | -0.28350000 |

|   |             |             |             |
|---|-------------|-------------|-------------|
| C | 1.65560000  | 8.09550000  | 1.83640000  |
| H | 1.56880000  | 9.18080000  | 1.79200000  |
| C | 1.88340000  | 7.46820000  | 3.05490000  |
| H | 1.95840000  | 8.07060000  | 3.96290000  |
| C | 6.33460000  | 6.84460000  | 6.35830000  |
| C | 6.80660000  | 8.00960000  | 5.74340000  |
| H | 6.72290000  | 8.12560000  | 4.66140000  |
| C | 7.39010000  | 9.01880000  | 6.50320000  |
| H | 7.76130000  | 9.91840000  | 6.01250000  |
| C | 7.50210000  | 8.87820000  | 7.88430000  |
| H | 7.96380000  | 9.66730000  | 8.47730000  |
| C | 7.02780000  | 7.72590000  | 8.50470000  |
| H | 7.11640000  | 7.60580000  | 9.58390000  |
| C | 6.12730000  | 5.80920000  | 3.70190000  |
| C | 5.38000000  | 6.35810000  | 2.65860000  |
| H | 4.35560000  | 6.68960000  | 2.81760000  |
| C | 5.93060000  | 6.47720000  | 1.38450000  |
| H | 5.32540000  | 6.89120000  | 0.57820000  |
| C | 7.23700000  | 6.06630000  | 1.14780000  |
| H | 7.66580000  | 6.15310000  | 0.14980000  |
| C | 8.00280000  | 5.55070000  | 2.19310000  |
| H | 9.03170000  | 5.23860000  | 2.01790000  |
| C | 7.45250000  | 5.42320000  | 3.46140000  |
| H | 8.05840000  | 5.01710000  | 4.27520000  |
| C | 1.81770000  | -0.61580000 | 5.99900000  |
| C | 1.80010000  | -1.12410000 | 7.29830000  |
| H | 2.69640000  | -1.06800000 | 7.92080000  |
| C | 0.64970000  | -1.70440000 | 7.82700000  |
| H | 0.66310000  | -2.10190000 | 8.84310000  |
| C | -0.50660000 | -1.77590000 | 7.05640000  |
| H | -1.41020000 | -2.22720000 | 7.46670000  |
| C | -0.50930000 | -1.25590000 | 5.76390000  |
| H | -1.41470000 | -1.28710000 | 5.15660000  |
| C | 0.64260000  | -0.67690000 | 5.23760000  |
| H | 0.61390000  | -0.26030000 | 4.22910000  |
| C | 3.85280000  | -0.72370000 | 3.38800000  |
| C | 2.95960000  | -1.72530000 | 2.99290000  |
| H | 2.14780000  | -2.03330000 | 3.65440000  |
| C | 3.08780000  | -2.33620000 | 1.74720000  |
| H | 2.37630000  | -3.10810000 | 1.44960000  |
| C | 4.11090000  | -1.95740000 | 0.88170000  |
| H | 4.20750000  | -2.43200000 | -0.09480000 |
| C | 5.00790000  | -0.96540000 | 1.26850000  |
| H | 5.81210000  | -0.65870000 | 0.59990000  |
| C | 4.87910000  | -0.35000000 | 2.51220000  |
| H | 5.58560000  | 0.43700000  | 2.77880000  |
| C | 4.07140000  | -3.57520000 | 6.93520000  |
| C | 3.20570000  | -4.26760000 | 7.78540000  |
| H | 3.30360000  | -4.17420000 | 8.86950000  |
| C | 2.19270000  | -5.05940000 | 7.25050000  |

|   |             |             |             |
|---|-------------|-------------|-------------|
| H | 1.50840000  | -5.58640000 | 7.91540000  |
| C | 2.04760000  | -5.16810000 | 5.87000000  |
| H | 1.24880000  | -5.78120000 | 5.45350000  |
| C | 2.92210000  | -4.49570000 | 5.01970000  |
| H | 2.81430000  | -4.58020000 | 3.93790000  |
| C | 3.92950000  | -3.69390000 | 5.54980000  |
| H | 4.59050000  | -3.14450000 | 4.87200000  |
| C | 7.31700000  | -3.31050000 | 7.27100000  |
| C | 7.27110000  | -4.66050000 | 6.91010000  |
| H | 6.31090000  | -5.17510000 | 6.82720000  |
| C | 8.45180000  | -5.35170000 | 6.64720000  |
| H | 8.41280000  | -6.40280000 | 6.36130000  |
| C | 9.67840000  | -4.69940000 | 6.74420000  |
| H | 10.60050000 | -5.24110000 | 6.53400000  |
| C | 9.72940000  | -3.35490000 | 7.10390000  |
| H | 10.68860000 | -2.84290000 | 7.17810000  |
| C | 8.55160000  | -2.66070000 | 7.36590000  |
| H | 8.60100000  | -1.60440000 | 7.64200000  |
| C | 5.32010000  | -2.64350000 | 9.79490000  |
| C | 4.51020000  | -1.83130000 | 10.59500000 |
| H | 4.01100000  | -0.95510000 | 10.17600000 |
| C | 4.33460000  | -2.13180000 | 11.94410000 |
| H | 3.70360000  | -1.49370000 | 12.56240000 |
| C | 4.96710000  | -3.24170000 | 12.49840000 |
| H | 4.83200000  | -3.47320000 | 13.55470000 |
| C | 5.77280000  | -4.05520000 | 11.70530000 |
| H | 6.26920000  | -4.92290000 | 12.13980000 |
| C | 5.94840000  | -3.76000000 | 10.35570000 |
| H | 6.58240000  | -4.40300000 | 9.74040000  |
